# Supplementary material for: Quantitative proteomic analysis of HeLa cells in response to biocompatible Fe2C@C nanoparticles: 16O/18O-labelling & HPLC-ESI-orbit-trap profiling approach
Source: Royal Society of Chemistry journal article supplement (doi:10.1039/c7tx00248c), 2017-11-07
Supplement: c7tx00248c1.pdf [file c7tx00248c1.pdf]

# Supporting Information

## **Quantitative Proteomic Analysis of HeLa Cells in Response to Biocompatible Fe<sub>2</sub>C@C Nanoparticles: <sup>16</sup>O/<sup>18</sup>O-Labeled & HPLC-ESI-Orbit-Trap Profiling Approach**

*Murtaza Hasan<sup>a,b</sup>, Ghazala Mustafa<sup>c</sup>, Javed iqbal<sup>d</sup>, Muhammad Ashfaq<sup>a</sup>, Nasir Mahmood<sup>e,f,\*</sup>*

*<sup>a</sup>Department of Biochemistry and Biotechnology, The Islamia University of Bahawalpur, Pakistan*

*<sup>b</sup>Department of Materials Science and Engineering, College of Engineering, Peking University, Beijing, 178001, China.*

*<sup>c</sup>Department of Plant Sciences, Quaid-i-Azam University, Islamabad 45320, Pakistan*

*<sup>d</sup>College of Life Sciences, Shenzhen University, Shenzhen 10590, China*

*<sup>e</sup> School of Engineering, RMIT University, 124 La Trobe Street, 3001 Melbourne, Victoria, Australia*

*<sup>f</sup>Center of Micro-Nano Functional Materials and Devices, School of Energy Science and Engineering, State key Laboratory of Electronic Thin Films and Integrated Devices, University of Electronic Science and Technology of China, Chengdu, 611731, China*

\*Corresponding Author: Nasir Mahmood (PhD.) Email: [nasir.mahmood@rmit.edu.au](mailto:nasir.mahmood@rmit.edu.au) and  
Phone/Fax: +61423669339.

## **Materials and method (SM)**

### **Synthesis of Fe<sub>2</sub>C@C NPs (MS1)**

In a typical synthesis of Fe<sub>2</sub>C@C NPs, octadecylamine (14.5 g) and cetrimonium bromide (CTAB, 0.113 g) was heated to 120 °C after degassing under N<sub>2</sub> flow, while later on Fe(CO)<sub>5</sub> (0.5 mL, 3.6 mmol) is injected under a N<sub>2</sub> blanket. Afterwards temperature was raised to 180 °C at 10 °C /min and kept constant for 10 min, and then increased to 350 °C and kept for 10 min before cooling to room temperature. Finally product was washed repeatedly with ethanol and hexane for 6 times and dried under vacuum at 70 °C. The morphological study was carried out using FEI Tecnai T20 transmission electron microscopy (TEM), shown in Figure S1 where homogeneity in size and well dispersions obvious.

### **Surface Coating of Nanoparticles**

Initially, 0.4 g of protocatechuic acid (PA) was dissolved the mixed solution of 1 mL pyridine and 3 mL toluene. Then the mixture was added drop wise into 100 mL of the toluene containing 100 mg Fe<sub>2</sub>C@C NPs. The Fe<sub>2</sub>C@C NPs were precipitated after addition of PA solution. The precipitate was dissolved in sodium carbonate solution (1%, w/v, 10 mL). Excess ethanol was added to the solution and the product was collected by centrifugation. Finally, the product was washed 6 times repeatedly with water and ethanol.

### ***In-vitro* cytotoxicity of Fe<sub>2</sub>C@C NPs (MS2)**

The MTT assay on HeLa cell was employed to study the cytotoxicity effect of Fe<sub>2</sub>C NPs. The 96-well cell culture plates were used to seed the cells at 5×10<sup>3</sup> cells in each well, which were then incubated overnight at 37 °C under 5% CO<sub>2</sub>. A fresh culture medium with different concentrations of Fe<sub>2</sub>C NPs was used to replace the old one and further incubated for 24 h. The MTT assay studies were carried out after cleansing the cells with Dulbecco's phosphate buffered saline (DPBS). The luminescence microplate reader (Spectra ax M2, Molecular Device, USA) was used to record the OD570 value (Abs.) for each cell-well.

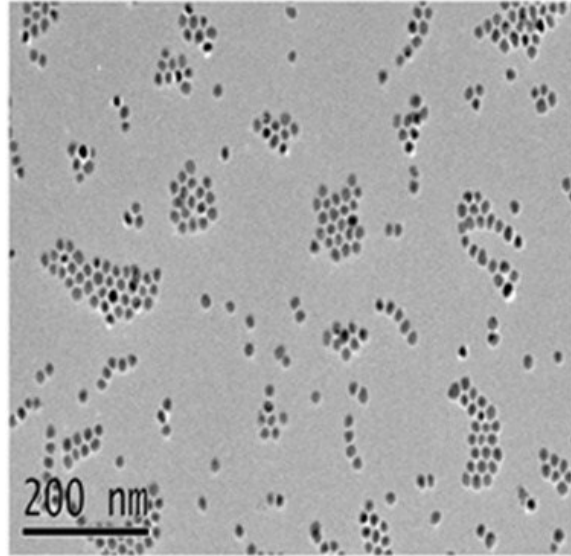

**Fig. S1.** TEM image of  $\text{Fe}_2\text{C}@\text{C}$  NPs and (b) size distribution of  $\text{Fe}_2\text{C}@\text{C}$  NPs.

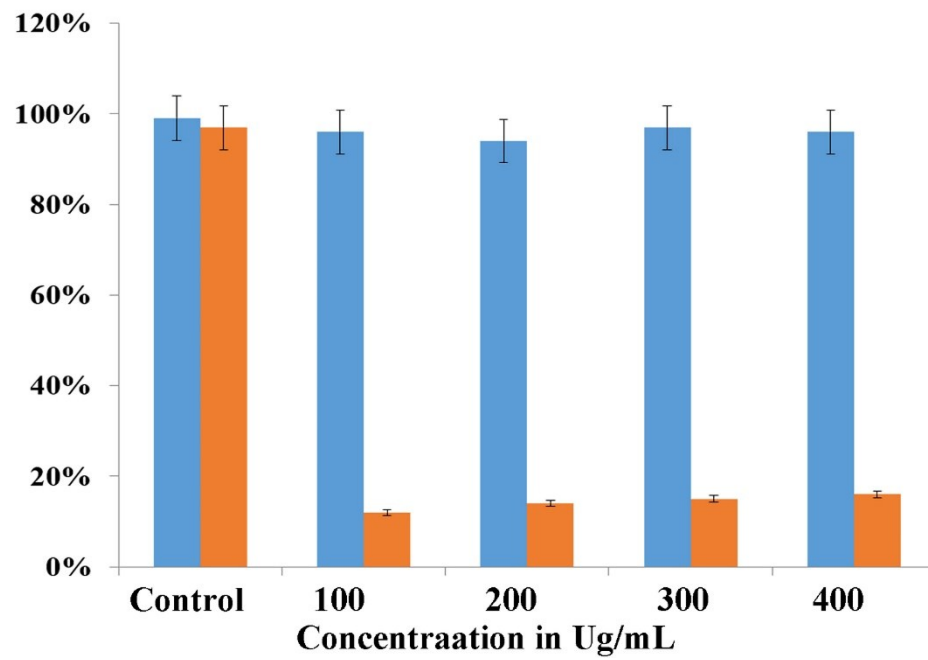

**Fig. S2.** Cytotoxicity of  $\text{Fe}_2\text{C}@\text{C}$  NPs with and without biocompatible coating in HeLa cell line.

**Table S1.** Expression of total protein in response to Fe<sub>2</sub>C@C NPs.

| Protein ID | Description                                            | Symbol   | O16/O18 ratio | Molecular Weight | IP | Status       | Location                         | Function                                                     |
|------------|--------------------------------------------------------|----------|---------------|------------------|----|--------------|----------------------------------|--------------------------------------------------------------|
| P0CG48     | UBC Polyubiquitin-C                                    | UBC      | 0.21          | 77,039 DA        | 5  | upregulated  | Cytoplasm Nucleus                | Activation of protein kinases, and in signaling              |
| P62979     | RPS27A Ubiquitin-40S ribosomal protein S27a            | RPS27A   | 0.21          | 17,965 DA        | 5  | upregulated  | Cytoplasm Nucleus                | Activation of protein kinases, and in signaling.             |
| P62987     | UBA52 Ubiquitin-60S ribosomal protein L40              | UBA52    | 0.21          | 14,728 DA        | 5  | upregulated  | Cytoplasm Nucleus                | Activation of protein kinases, and in signaling.             |
| P52209     | PGD 6-phosphogluconate dehydrogenase, decarboxylating  | PGD      | 0.31          | 51872DA          | 1  | upregulated  | Cytoplasm                        | oxidative decarboxylation                                    |
| Q16881     | TXNRD1 Thioredoxin reductase 1, cytoplasmic            | TXNRD1   | 0.33          | 70,906 DA        | 2  | upregulation | Cytoplasm Nucleus                | Formation of cell membrane protrusions                       |
| P07355     | ANXA2 Annexin A2                                       | ANXA2    | 0.37          | 38,604 DA        | 13 | upregulated  | Membrane, Extracellular matrix   | Calcium-regulated membrane-binding protein                   |
| Q15293     | RCN1 Reticulocalbin-1                                  | RCN1     | 0.39          | 38,890 DA        | 1  | upregulated  | Endoplasmic reticulum            | Regulate calcium-dependent activities                        |
| P63173     | RPL38 60S ribosomal protein L38                        | RPL38    | 0.39          | 8,218 DA         | 1  | Upregulated  | Ribosomes large sub unit         | structural constituent of ribosome                           |
| P00338     | LDHA L-lactate dehydrogenase A chain                   | LDHA     | 0.39          | 36,689 DA        | 3  | Upregulated  | Cytoplasm                        | Control fermentation process                                 |
| P42166     | TMPO Lamina-associated polypeptide 2, isoform alpha    | TMPO     | 0.4           | 75,492 DA        | 2  | upregulated  | Nucleus                          | structural organization of the nucleus                       |
| P08758     | ANXA5 Annexin A5                                       | ANXA5    | 0.41          | 35,937 DA        | 2  | upregulated  | Cytosole                         | Anticoagulant protein                                        |
| P23528     | CFL1 Cofilin-1                                         | CFL1     | 0.42          | 18 kda           | 7  | upregulated  | Protein kinase receptor          | No data                                                      |
| P13797     | PLS3 Plastin-3                                         | PLS3     | 0.43          | 70,811 DA        | 1  | upregulated  | Cytoplasm                        | Regulation of bone development                               |
| P14618     | PKM Pyruvate kinase isozymes M1/M2                     | PKM      | 0.44          | 57,937 DA        | 8  | Upregulated  | Cytoplasm Nucleus                | Tumor cell proliferation and survival                        |
| P27348     | YWHAQ 14-3-3 protein theta                             | YWHAQ    | 0.45          | 27,764 DA        | 3  | upregulated  | Cytoplasm                        | Negatively regulates the kinase activity                     |
| O75533     | SF3B1 Splicing factor 3B subunit 1                     | SF3B1    | 0.47          | 145,830 DA       | 2  | Upregulated  | Nucleus, Spliceosome             | splicing of rare class of nuclear pre-mRNA intron.           |
| P18085     | ARF4 ADP-ribosylation factor 4                         | ARF4     | 0.47          | 20,511 DA        | 2  | Upregulated  | Golgi apparatus                  | vesicle budding and uncoating within the Golgi apparatus     |
| Q01518     | CAP1 Adenylyl cyclase-associated protein 1             | CAP1     | 0.47          | 51,901 DA        | 1  | upregulated  | Cell membrane                    | Cell polarity                                                |
| P18669     | PGAM1 Phosphoglycerate mutase 1                        | PGAM1    | 0.48          | 28,804 DA        | 1  | Upregulated  | Cytoplasm                        | reduced activity                                             |
| P10599     | TXN Thioredoxin                                        | TXN      | 0.49          | 11,737 DA        | 1  | Upregulated  | Nucleus cytoplasm                | inhibits caspase-3 activity                                  |
| P29401     | TKT Transketolase                                      | TKT      | 0.49          | 67,878 DA        | 6  | Upregulated  | Cytosol                          | Activates co-factor                                          |
| Q9UK76     | HN1 Hematological and neurological expressed 1 protein | HN1      | 0.49          | 16,015 DA        | 1  | Upregulated  | Nucleus                          | N-terminally processed                                       |
| P51610     | HCFC1 Host cell factor 1                               | HCFC1    | 0.49          | 208,732 DA       | 1  | Upregulated  | Cytoplasm Nucleus                | Control of the cell cycle                                    |
| P37802     | TAGLN2 Transgelin-2                                    | TAGLN2   | 0.5           | 22,391 DA        | 1  | up           | extracellular exosome            | Differentiation process                                      |
| P40227     | CCT6A T-complex protein 1 subunit zeta                 | CCT6A    | 0.5           | 58,024 DA        | 1  | Up           | Cytoplasm                        | folding of actin and tubulin.                                |
| P68366     | TUBA4A Tubulin alpha-4A chain                          | TUBA4A   | 0.5           | 49,924 DA        | 5  | up           | Cytoskeleton                     | major constituent of microtubules                            |
| P49915     | GMPS GMP synthase                                      | GMPS     | 0.51          | 76,715 DA        | 2  | up           | Cytoplasm                        | cellular processes important for cell division.              |
| P07195     | LDHB L-lactate dehydrogenase B chain                   | LDHB     | 0.51          | 36,638 DA        | 4  | up           | Cytoplasm                        | Fermentation process                                         |
| P49327     | FASN Fatty acid synthase                               | FASN     | 0.52          | 273,427 DA       | 5  | Up           | Cytoplasm                        | Carrier protein                                              |
| P11586     | MTHFD1 C-1-tetrahydrofolate synthase, cytoplasmic      | MTHFD1   | 0.52          | 101,559 DA       | 1  | up           | Cytoplasm                        | part of One-carbon metabolism                                |
| P09211     | GSTP1 Glutathione S-transferase P                      | GSTP1    | 0.52          | 23,356 DA        | 1  | up           | Cytoplasm, nucleus, mitochondria | prevent neurodegeneration                                    |
| P62258     | YWHAE 14-3-3 protein epsilon                           | YWHAE    | 0.52          | 29,174 DA        | 3  | up           | Cytoplasm, Melanosomes           | modulation of the activity of the binding partner            |
| P63104     | YWHAZ 14-3-3 protein zeta/delta                        | YWHAZ    | 0.52          | 27,745 DA        | 6  | up           | Cytoplasm, Melanosomes           | modulation of the activity of the binding partner            |
| P51149     | RAB7A Ras-related protein Rab-7a                       | RAB7A    | 0.52          | 23,490 DA        | 2  | up           | Cytoplasm                        | Key regulator in endo-lysosomal trafficking.                 |
| P17655     | CAPN2 Calpain-2 catalytic subunit                      | CAPN2    | 0.53          | 79,995 DA        | 1  | up           | Cytoplasm, cell membrane         | Calcium-regulated non-lysosomal thiol-protease               |
| O00764     | PDXK Pyridoxal kinase                                  | PDXK     | 0.53          | 35,102 DA        | 2  | up           | Cytoplasm                        | synthesis of pyridoxal-5-phosphate from vitamin B6.          |
| P06744     | GPI Glucose-6-phosphate isomerase                      | GPI      | 0.53          | 63,147 DA        | 3  | up           | Cytoplasm                        | tumor-secreted cytokine and an angiogenic factor             |
| P07900     | HSP90AA1 Heat shock protein HSP 90-alpha               | HSP90AA1 | 0.53          | 84,660 DA        | 15 | up           | Cytoplasm, Cell,m melanosomes    | cell cycle control and signal transduction                   |
| O60701     | UGDH UDP-glucose 6-dehydrogenase                       | UGDH     | 0.53          | 55,024 DA        | 1  | up           | Cytosol nucleoplasm              | biosynthesis of glycosaminoglycans                           |
| P08238     | HSP90AB1 Heat shock protein HSP 90-beta                | HSP90AB1 | 0.54          | 83,264 DA        | 16 | up           | Cytoplasm Melanosomes            | control target protein in cell cycle and signal transduction |

|        |                                                           |         |      |            |    |    |                                  |                                                                    |
|--------|-----------------------------------------------------------|---------|------|------------|----|----|----------------------------------|--------------------------------------------------------------------|
| P53621 | COPA Coatomer subunit alpha                               | COPA    | 0.54 | 138,346 DA | 1  | up | Cytoplasm Golgi bodies           | Golgi structural integrity and endocytic recycling                 |
| P98082 | DAB2 Disabled homolog 2                                   | DAB2    | 0.55 | 82,448DA   | 1  | up | Cytoplasm Vesicle membrane       | Act as a tumor suppressor                                          |
| P25789 | PSMA4 Proteasome subunit alpha type-4                     | PSMA4   | 0.56 | 29,484 DA  | 1  | up | Cytoplasm Nucleus                | multicatalytic proteinase complex                                  |
| Q06830 | PRDX1 Peroxiredoxin-1                                     | PRDX1   | 0.56 | 22,110 DA  | 3  | up | Cytoplasm Melanosomes            | Involved in redox regulation of the cell.                          |
| P06733 | ENO1 Alpha-enolase                                        | ENO1    | 0.56 | 47169DA    | 8  | up | Cytoplasm Cell membrane          | Control growth, hypoxia tolerance and allergic responses           |
| P18206 | VCL Vinculin                                              | VCL     | 0.56 | 123,799 DA | 3  | up | Cell membrane                    | cell-matrix adhesion and cell-cell adhesion                        |
| P48643 | CCT5 T-complex protein 1 subunit epsilon                  | CCT5    | 0.56 | 59,671 DA  | 3  | up | Cytoplasm                        | in vitro, in the folding of actin and tubulin                      |
| P41250 | GARS Glycine--tRNA ligase                                 | GARS    | 0.56 | 83,166 DA  | 3  | up | Cytoplasm, Mitochondria, Axon    | A universal pleiotropic signaling molecule                         |
| P53396 | ACLY ATP-citrate synthase                                 | ACLY    | 0.56 | 120839 DA  | 3  | up | Cytoplasm                        | Synthesis of cytosolic acetyl-CoA                                  |
| Q9NR31 | SAR1A GTP-binding protein SAR1a                           | SAR1A   | 0.56 | 22,367 DA  | 1  | up | ER and Golgi                     | Transport from the endoplasmic reticulum to the Golgi apparatus    |
| P04792 | HSPB1 Heat shock protein beta-1                           | HSPB1   | 0.57 | 22,783 DA  | 4  | up | Cytoplasm Nucleus                | Involved in stress resistance and actin organization               |
| Q14818 | PSMA7 Proteasome subunit alpha type-7                     | PSMA7   | 0.57 | 27,887 DA  | 1  | up | Cytoplasm Nucleus                | immune response                                                    |
| P62826 | RAN GTP-binding nuclear protein Ran                       | RAN     | 0.57 | 24,423 DA  | 2  | up | Nucleus nuclear membrane         | Involved in chromatin condensation and control of cell cycle       |
| P15311 | EZR Ezrin                                                 | EZR     | 0.57 | 69,413 DA  | 4  | up | Cytoskeleton Cell membrane       | connections cytoskeletal structures to the plasma membrane         |
| P45974 | USP5 Ubiquitin carboxyl-terminal hydrolase 5              | USP5    | 0.58 | 95,786 DA  | 1  | up | Lysosomes                        | proteasomal recognition                                            |
| Q99497 | PARK7 Protein DJ-1                                        | PARK7   | 0.58 | 19,891 DA  | 1  | up | Cytoplasm nucleus Mitochondria   | cell protection mechanism against induced metal toxicity           |
| Q15021 | NCAPD2 Condensin complex subunit 1                        | NCAPD2  | 0.59 | 157,182 DA | 1  | up | Cytoplasm Nucleus                | Regulatory subunit of the condensin complex                        |
| P52907 | CAPZA1 F-actin-capping protein subunit alpha-1            | CAPZA1  | 0.59 | 32,923 DA  | 1  | up | Cytoplasm                        | F-actin-capping proteins bind in a Ca <sup>2+</sup> -independent   |
| Q9NTK5 | OLA1 Obg-like ATPase 1                                    | OLA1    | 0.59 | 44,744 DA  | 1  | up | Cytoplasm Nucleus                | Hydrolyzes ATP and GTP                                             |
| Q15691 | MAPRE1 Microtubule-associated protein RP/EB family member | MAPRE1  | 0.59 | 29,999 DA  | 1  | up | Cytoskeleton                     | regulates the dynamics of the microtubule cytoskeleton             |
| Q93009 | USP7 Ubiquitin carboxyl-terminal hydrolase 7              | USP7    | 0.6  | 128,302 DA | 1  | up | Cytoplasm Nucleus                | crucial for Treg cell function                                     |
| P50991 | CCT4 T-complex protein 1 subunit delta                    | CCT4    | 0.6  | 57,924 DA  | 1  | up | Cytoplasm, Cytoskeleton          | folding of proteins upon ATP hydrolysis                            |
| Q71U36 | TUBA1A Tubulin alpha-1A chain                             | TUBA1A  | 0.6  | 50,136 DA  | 6  | up | Cytoskeleton                     | constituent of microtubules                                        |
| Q92973 | TNPO1 Transportin-1                                       | TNPO1   | 0.6  | 102,355 DA | 1  | up | Cytoplasm Nucleus                | Nuclear protein import as nuclear transport receptor               |
| P31689 | DNAJA1 DnaJ homolog subfamily A member 1                  | DNAJA1  | 0.6  | 44,868 DA  | 1  | up | Cytoplasm, Nucleus ,mitochondria | Promotes apoptosis in response to cellular stress                  |
| Q99832 | CCT7 T-complex protein 1 subunit eta                      | CCT7    | 0.61 | 59,367 DA  | 2  | up | Cytoplasm                        | folding of actin and tubulin                                       |
| P60842 | EIF4A1 Eukaryotic initiation factor 4A-I                  | EIF4A1  | 0.61 | 46,154 DA  | 2  | up | Cytoplasm Membrane               | scanning for the initiator codon                                   |
| Q14240 | EIF4A2 Eukaryotic initiation factor 4A-II                 | EIF4A2  | 0.61 | 46,402 DA  | 1  | up | Cytosol                          | required for mRNA binding to ribosome                              |
| P00761 | Trypsin OS=Sus scrofa PE=1 SV=1                           | Trypsin | 0.62 | 24,409 DA  | 7  | up | Extracellular space              | Preferential cleavage                                              |
| Q00610 | CLTC Clathrin heavy chain 1                               | CLTC    | 0.62 | 191,615 DA | 6  | up | Cytoplasm Melanosomes            | Major protein of the polyhedral coat of coated pits and vesicles   |
| P22392 | NME2 Nucleoside diphosphate kinase B                      | NME2    | 0.62 | 17,298 DA  | 3  | up | Cytoplasm Nucleus                | synthesis of nucleoside triphosphates other than ATP               |
| P55060 | CSE1L Exportin-2                                          | CSE1L   | 0.62 | 110,417 DA | 4  | up | Cytoplasm Nucleus                | Cargo of GTP- and GDP between the cytoplasm and nucleus            |
| Q96GG9 | DCUN1D1 DCN1-like protein 1                               | DCUN1D1 | 0.62 | 30,124 DA  | 1  | up | Nucleus                          | facilitating malignant transformation and carcinogenic progression |
| P07437 | TUBB Tubulin beta chain                                   | TUBB    | 0.63 | 49,671 DA  | 12 | up | Cytoplasm                        | It binds two moles of GTP                                          |
| P68371 | TUBB4B Tubulin beta-4B chain                              | TUBB4B  | 0.63 | 49,831 DA  | 8  | up | Cytoplasm                        | It binds two moles of GTP                                          |
| Q86VP6 | CAND1 Cullin-associated NEDD8-dissociated protein 1       | CAND1   | 0.63 | 136,376 DA | 2  | up | Cytoplasm Nucleus                | promotes the exchange of the substrate-recognition                 |
| P17987 | TCP1 T-complex protein 1 subunit alpha                    | TCP1    | 0.63 | 60,344 DA  | 1  | up | Cytoplasm                        | in vitro, in the folding of actin and tubulin                      |
| Q92499 | DDX1 ATP-dependent RNA helicase DDX1                      | DDX1    | 0.64 | 82,432 DA  | 5  | up | Cytoplasm Nucleus                | play a role in RNA clearance at DNA double-strand breaks           |
| P50990 | CCT8 T-complex protein 1 subunit theta                    | CCT8    | 0.64 | 59,621 DA  | 2  | up | Cytoplasm                        | in vitro, in the folding of actin and tubulin                      |
| P61204 | ARF3 ADP-ribosylation factor 3                            | ARF3    | 0.64 | 20,601 DA  | 3  | up | Cytoplasm Golgi bodies           | Involved in protein trafficking                                    |
| P84077 | ARF1 ADP-ribosylation factor 1                            | ARF1    | 0.64 | 20,697 DA  | 3  | up | Cytoplasm Golgi bodies           | Involved in protein trafficking among different compartments.      |
| P84085 | ARF5 ADP-ribosylation factor 5                            | ARF5    | 0.64 | 20,530 DA  | 1  | up | Cytoplasm Golgi bodies           | Involved in protein trafficking                                    |
| Q16658 | FSCN1 Fascin                                              | FSCN1   | 0.64 | 54,530 DA  | 2  | up | Cytoplasm                        | organization of actin filament bundles                             |

|        |                                                             |          |      |            |    |    |                                 |                                                                     |
|--------|-------------------------------------------------------------|----------|------|------------|----|----|---------------------------------|---------------------------------------------------------------------|
| Q13748 | TUBA3D Tubulin alpha-3C/D chain                             | TUBA3D   | 0.65 | 49,960 DA  | 1  | up | Cytoplasm                       | It binds two moles of GTP                                           |
| P26639 | TARS Threonine--tRNA ligase, cytoplasmic                    | TARS     | 0.65 | 83,435 DA  | 1  | up | Cytoplasm                       | threonine-tRNA ligase activity                                      |
| Q9HB71 | CACYBP Calcyclin-binding protein                            | CACYBP   | 0.66 | 26,210 DA  | 1  | up | Cytoplasm Nucleus               | alcium-dependent ubiquitination                                     |
| O75937 | DNAJC8 DnaJ homolog subfamily C member 8                    | DNAJC8   | 0.66 | 29,842 Da  | 1  | up | Cytoplasm Nucleoplasm           | RNA splicing                                                        |
| P00558 | PGK1 Phosphoglycerate kinase 1                              | PGK1     | 0.66 | 44,615 DA  | 4  | up | Cytoplasm                       | glycolytic enzyme                                                   |
| P27797 | CALR Calreticulin                                           | CALR     | 0.66 | 48,142 DA  | 8  | up | Cytoplasm Endoplasmic reticulum | Involved in maternal gene expression regulation                     |
| P07737 | PFN1 Profilin-1                                             | PFN1     | 0.66 | 15,054 DA  | 3  | up | Cytoskeleton                    | affects the structure of the cytoskeleton                           |
| Q53FA3 | HSPA1L Heat shock 70kDa protein 1-like variant              | HSPA1L   | 0.67 | 70404 DA   | 4  | up | Cytosol nucleoplasm             | Stress responses                                                    |
| O00629 | KPNA4 Importin subunit alpha-4                              | KPNA4    | 0.67 | 57,887 DA  | 1  | up | Cytoplasm nucleus               | In vitro, mediates the nuclear import of human cytomegalovirus      |
| P36873 | PPP1CC Serine/threonine-protein phosphatase PP1-gamma cat   | PPP1CC   | 0.68 | 36,984 DA  | 2  | up | Cytoplasm Nucleus Mitochondria  | Control of chromatin structure and cell cycle progression           |
| P62136 | PPP1CA Serine/threonine-protein phosphatase PP1-alpha cat   | PPP1CA   | 0.68 | 37,512 DA  | 2  | up | Cytoplasm Nucleus               | chromatin structure and cell cycle progression                      |
| P62140 | PPP1CB Serine/threonine-protein phosphatase PP1-beta cata   | PPP1CB   | 0.68 | 37,187 DA  | 1  | up | Cytoplasm Nucleus               | control of chromatin structure and cell cycle progression           |
| Q14978 | NOLC1 Nucleolar and coiled-body phosphoprotein 1            | NOLC1    | 0.68 | 73,603 DA  | 2  | up | Cytoplasm Nucleus               | maintenance of the fundamental structure of the fibrillar cente     |
| Q14974 | KPNB1 Importin subunit beta-1                               | KPNB1    | 0.68 | 97,170 DA  | 3  | up | Cytoplasm Nuclear envelop       | Functions in nuclear protein import                                 |
| P61981 | YWHAG 14-3-3 protein gamma                                  | YWHAG    | 0.68 | 28,303 DA  | 3  | up | Cytoplasm                       | Adapter protein implicated in the regulation of a large spectrum    |
| Q16181 | SEPT7 Septin-7                                              | 7-Sep    | 0.68 | 50,680 DA  | 1  | up | Cytoplasm                       | Involved in cytokinesis                                             |
| Q9NYU2 | UGGT1 UDP-glucose: glycoprotein glucosyltransferase 1       | UGGT1    | 0.69 | 177,190 DA | 1  | up | Endoplasmic reticulum           | Recognizes glycoproteins with minor folding defects                 |
| P20700 | LMNB1 Lamin-B1                                              | LMNB1    | 0.7  | 66,408 DA  | 1  | up | Nucleus inner membrane          | framework for the nuclear envelope                                  |
| P68104 | EEF1A1 Elongation factor 1-alpha 1                          | EEF1A1   | 0.7  | 50,141 DA  | 10 | up | Nucleus cytoplasm               | involved importantly in Th1 cytokine production                     |
| Q05639 | EEF1A2 Elongation factor 1-alpha 2                          | EEF1A2   | 0.7  | 50,470 DA  | 11 | up | Nucleus                         | promotes Protein synthesis                                          |
| Q8N1F7 | NUP93 Nuclear pore complex protein Nup93                    | NUP93    | 0.7  | 93,488 DA  | 1  | up | Nucleus membrane                | Plays a role in the nuclear pore complex                            |
| P06753 | TPM3 Tropomyosin alpha-3 chain                              | TPM3     | 0.7  | 32,950 DA  | 1  | up | Cytoskeleton                    | stabilizing cytoskeleton actin filaments.                           |
| O14980 | XPO1 Exportin-1                                             | XPO1     | 0.7  | 123,386 DA | 3  | up | Nucleus cytoplasm               | Mediates the nuclear export of cellular proteins                    |
| P60174 | TP11 Triosephosphate isomerase                              | TP11     | 0.7  | 30,791 DA  | 3  | up | Cytosol nucleus                 | Carbohydrate biosynthesis                                           |
| Q53EL6 | PDCD4 Programmed cell death protein 4                       | PDCD4    | 0.71 | 51,735 DA  | 1  | up | Nucleus cytoplasm               | Inhibits translation initiation and cap-dependent translation       |
| Q9BUJ2 | HNRNPUL1 Heterogeneous nuclear ribonucleoprotein U-like pro | HNRNPUL1 | 0.71 | 95,739 DA  | 1  | up | Nucleus                         | Acts as a basic transcriptional regulator                           |
| P22234 | PAICS Multifunctional protein ADE2                          | PAICS    | 0.72 | 47,079 DA  | 1  | up | Cytosol                         | Synthesis pathway                                                   |
| Q09028 | RBBP4 Histone-binding protein RBBP4                         | RBBP4    | 0.73 | 47,656 DA  | 1  | up | Nucleus                         | may target chromatin assembly factors                               |
| Q9ULV4 | CORO1C Coronin-1C                                           | CORO1C   | 0.73 | 53,249 DA  | 3  | up | Cytoplasm Cell membrane         | May be involved in cytokinesis, motility, and signal transduction   |
| P11142 | HSPA8 Heat shock cognate 71 kDa protein                     | HSPA8    | 0.73 | 70,898 DA  | 16 | up | Cytoplasm nucleus cell membrane | Acts as a repressor of transcriptional activation                   |
| P55209 | NAP1L1 Nucleosome assembly protein 1-like 1                 | NAP1L1   | 0.73 | 45,374 DA  | 1  | up | Nucleus                         | modulating chromatin formation to regulation of cell proliferation. |
| P35232 | PHB Prohibitin                                              | PHB      | 0.73 | 29,804 DA  | 2  | up | Mitochondrial Inner membrane    | regulating mitochondrial respiration activity and in aging          |
| O43707 | ACTN4 Alpha-actinin-4                                       | ACTN4    | 0.73 | 104,854 DA | 6  | up | Cytoplasm Nucleus               | vesicular trafficking via its association with the CART complex     |
| Q6IS14 | EIF5A1 Eukaryotic translation initiation factor 5A-1-like   | EIF5A1   | 0.73 | 16,773 DA  | 2  | up | Cytoplasm Nuclues ER            | Involved in actin dynamics and cell cycle progression               |
| Q9GZV4 | EIF5A2 Eukaryotic translation initiation factor 5A-2        | EIF5A2   | 0.73 | 16,793 DA  | 2  | up | Cytoplasm Nuclues ER            | Functions as a regulator of apoptosis                               |
| P41091 | EIF2S3 Eukaryotic translation initiation factor 2 subunit   | EIF2S3   | 0.73 | 51,109 DA  | 2  | up | Cytoplasm                       | early steps of protein synthesis by forming a ternary complex       |
| P55072 | VCP Transitional endoplasmic reticulum ATPase               | VCP      | 0.74 | 89,322 DA  | 5  | up | Cytoplasm Nuclues ER            | Necessary for the fragmentation of Golgi stacks during mitosis      |
| P30050 | RPL12 60S ribosomal protein L12                             | RPL12    | 0.74 | 17,819 DA  | 1  | up | Cytosol                         | Structural formation of ribosomes                                   |
| P08107 | HSPA1B Heat shock 70 kDa protein 1A/1B                      | HSPA1B   | 0.74 | 70 KD      | 7  | up | Cytoplasm Nucleus               | this protein stabilizes existing proteins against aggregation       |
| O15165 | C18orf1 Uncharacterized protein C18orf1                     | C18orf1  | 0.74 | 33,900 DA  | 1  | up | Early endosome membrane         | plays a role in cell proliferation, differentiation, apoptosis      |
| O95373 | IPO7 Importin-7                                             | IPO7     | 0.75 | 119,517 DA | 1  | up | Cytoplasm Nucleus               | Functions in nuclear protein import                                 |
| P14649 | MYL6B Myosin light chain 6B                                 | MYL6B    | 0.76 | 22,764 DA  | 1  | up | Cytosol                         | Regulatory light chain of myosin                                    |
| P60660 | MYL6 Myosin light polypeptide 6                             | MYL6     | 0.76 | 16,930 DA  | 1  | up | Cytosol                         | Regulatory light chain of myosin                                    |

|        |                                                             |        |      |            |    |    |                                  |                                                                        |
|--------|-------------------------------------------------------------|--------|------|------------|----|----|----------------------------------|------------------------------------------------------------------------|
| P61106 | RAB14 Ras-related protein Rab-14                            | RAB14  | 0.76 | 23,897 DA  | 2  | up | Endosome membrane                | membrane trafficking between the Golgi complex and endosomes           |
| P46940 | IQGAP1 Ras GTPase-activating-like protein IQGAP1            | IQGAP1 | 0.76 | 189,252 DA | 4  | up | Cell membrane                    | promote neurite outgrowth.                                             |
| P36776 | LONP1 Lon protease homolog, mitochondrial                   | LONP1  | 0.76 | 106,489 DA | 4  | up | Mitochondrial matrix             | mediates the selective degradation of misfolded, unassembled           |
| P12956 | XRCC6 X-ray repair cross-complementing protein 6            | XRCC6  | 0.76 | 69,843 DA  | 1  | up | Nucleus Chromosomes              | DNA non-homologous end joining                                         |
| Q92945 | KHSRP Far upstream element-binding protein 2                | KHSRP  | 0.77 | 73,115 DA  | 5  | up | Nucleus Cytoplasm                | degradation of inherently unstable mRNAs contain AU-rich element       |
| P21291 | CSRP1 Cysteine and glycine-rich protein 1                   | CSRP1  | 0.77 | 20,567 DA  | 1  | up | Nucleus                          | Could play a role in neuronal development                              |
| P12004 | PCNA Proliferating cell nuclear antigen                     | PCNA   | 0.78 | 28,769 DA  | 1  | up | Nucleus                          | involved in error-free pathway and employs recombination mechanisms    |
| P26641 | EEF1G Elongation factor 1-gamma                             | EEF1G  | 0.78 | 50,119 DA  | 8  | up | Cytoplasm Nucleus                | anchoring the complex to other cellular components                     |
| P05026 | ATP1B1 Sodium/potassium-transporting ATPase subunit beta-   | ATP1B1 | 0.79 | 35061 DA   | 4  | up | Cell membrane                    | Involved in cell adhesion and establishing epithelial cell polarity    |
| P04406 | GAPDH Glyceraldehyde-3-phosphate dehydrogenase              | GAPDH  | 0.79 | 36,053 DA  | 5  | up | Cytoplasm Nucleus                | playing a role in glycolysis and nuclear functions                     |
| P35637 | FUS RNA-binding protein FUS                                 | FUS    | 0.79 | 53,426 DA  | 5  | up | Nucleus                          | May play a role in maintenance of genomic integrity.                   |
| Q14828 | SCAMP3 Secretory carrier-associated membrane protein 3      | SCAMP3 | 0.79 | 38,287 DA  | 1  | up | Membrane                         | Acts as a recycling carrier to the cell surface                        |
| Q86V81 | ALYREF THO complex subunit 4                                | ALYREF | 0.79 | 26,888 DA  | 1  | up | Cytoplasm Nucleus                | Involved in transcription elongation and genome stability              |
| Q15029 | EFTUD2 116 kDa U5 small nuclear ribonucleoprotein component | EFTUD2 | 0.79 | 109,436 DA | 1  | up | Nucleus                          | required for pre-mRNA splicing. Binds GTP.                             |
| Q13263 | TRIM28 Transcription intermediary factor 1-beta             | TRIM28 | 0.8  | 88,550 DA  | 4  | up | Nucleus                          | remodeling and deacetylation (NuRD) complex                            |
| P08670 | VIM Vimentin                                                | VIM    | 0.8  | 53652 DA   | 16 | up | Cytoplasm                        | Involved with LARP6 in the stabilization of type I collagen mRNAs      |
| Q13765 | NACA Nascent polypeptide-associated complex subunit alp     | NACA   | 0.8  | 23,384 DA  | 2  | up | Cytoplasm Nucleus                | Prevents inappropriate targeting of non-secretory polypeptides ER      |
| Q01082 | SPTBN1 Spectrin beta chain, non-erythrocytic 1              | SPTBN1 | 0.8  | 274,609 DA | 2  | up | Cytoplasm Cytoskeleton           | Ca dependent movement of the cytoskeleton at the membrane              |
| P62937 | PPIA Peptidyl-prolyl cis-trans isomerase A                  | PPIA   | 0.8  | 18,012 DA  | 6  | up | Cytoplasm                        | accelerate the folding of proteins                                     |
| P14314 | PRKCSH Glucosidase 2 subunit beta                           | PRKCSH | 0.81 | 59,425 DA  | 1  | up | Endoplasmic reticulum            | Glycan metabolism                                                      |
| Q04637 | EIF4G1 Eukaryotic translation initiation factor 4 gamma 1   | EIF4G1 | 0.81 | 175,491 DA | 2  | up | Cytoplasm                        | involved in the recognition of the mRNA cap                            |
| P31930 | UQCRC1 Cytochrome b-c1 complex subunit 1, mitochondrial     | UQCRC1 | 0.81 | 52,646 DA  | 1  | up | Mitochondrion inner membrane     | It mediate formation of the complex between cytochromes c and c1.      |
| P29692 | EEF1D Elongation factor 1-delta                             | EEF1D  | 0.81 | 71,408 DA  | 4  | up | Nucleus                          | Heat shock protein binding                                             |
| P13639 | EEF2 Elongation factor 2                                    | EEF2   | 0.81 | 95,338 DA  | 11 | up | Cytoplasm Nucleus                | the mRNA and conformational changes in the ribosome                    |
| P30086 | PEBP1 Phosphatidylethanolamine-binding protein 1            | PEBP1  | 0.82 | 21,057 DA  | 1  | up | Cytoplasm                        | presynaptic cholinergic neurons of the central nervous system          |
| Q13838 | DDX39B Spliceosome RNA helicase DDX39B                      | DDX39B | 0.82 | 48,991 DA  | 1  | up | Cytoplasm Nucleus                | Involved in nuclear export of spliced and unspliced mRNA.              |
| P00505 | GOT2 Aspartate aminotransferase, mitochondrial              | GOT2   | 0.82 | 33,811 DA  | 5  | up | Golgi apparatus cell membrane CM | play a role in Golgi membrane trafficking                              |
| P30048 | PRDX3 Thioredoxin-dependent peroxide reductase, mitochondon | PRDX3  | 0.82 | 48,991 DA  | 1  | up | Cytoplasm Nucleus                | Involved in nuclear export of spliced and unspliced mRNA               |
| P04083 | ANXA1 Annexin A1                                            | ANXA1  | 0.82 | 38,714 DA  | 10 | up | Nucleus Cytoplasm membrane       | Plays important roles in the innate immune response                    |
| Q15459 | SF3A1 Splicing factor 3A subunit 1                          | SF3A1  | 0.82 | 88,886 DA  | 2  | up | Nucleus                          | involved in the assembly of the 'E' complex                            |
| Q96AE4 | FUBP1 Far upstream element-binding protein 1                | FUBP1  | 0.82 | 67,560 DA  | 2  | up | Nucleus                          | act both as activator and repressor of transcription                   |
| P63010 | AP2B1 AP-2 complex subunit beta                             | AP2B1  | 0.83 | 104553 DA  | 2  | up | Cell membrane                    | involved in clathrin-dependent endocytosis                             |
| O60869 | EDF1 Endothelial differentiation-related factor 1           | EDF1   | 0.83 | 16,369 DA  | 2  | up | Cytoplasm nucleus                | cells differentiation, lipid metabolism                                |
| P53999 | SUB1 Activated RNA polymerase II transcriptional coacti     | SUB1   | 0.83 | 14,395 DA  | 1  | up | Nucleus                          | Also binds, in vitro, non-specifically to double-stranded DNA          |
| Q9H4A6 | GOLPH3 Golgi phosphoprotein 3                               | GOLPH3 | 0.83 | 33,811 DA  | 1  | up | Mitochondria, Cell membrane, GA  | regulation of mitochondrial lipids biosynthesis.                       |
| P21333 | FLNA Filamin-A                                              | FLNA   | 0.83 | 280,739 DA | 39 | up | Cytoplasm > cytoskeleton         | Involved in ciliogenesis                                               |
| Q92616 | GCN1L1 Translational activator GCN1                         | GCN1L1 | 0.83 | 292,758 DA | 2  | up | Cytoplasm                        | activity in response to amino acid starvation                          |
| Q01105 | SET Protein SET                                             | SET    | 0.84 | 33,489 DA  | 7  | up | Cytoplasm Nucleus, ER            | Multitasking protein, involved in apoptosis, transcription, nucleosome |
| P19338 | NCL Nucleolin                                               | NCL    | 0.84 | 76614 DA   | 9  | up | Cytoplasm nucleus                | associated with intranuclear chromatin and pre-ribosomal particles     |
| P04843 | RPN1 Dolichyl-diphosphooligosaccharide--protein glycosy     | RPN1   | 0.84 | 68,569 DA  | 7  | up | ER, Melanosomes                  | Essential subunit of the N-oligosaccharyl transferase                  |
| O75369 | FLNB Filamin-B                                              | FLNB   | 0.84 | 278,164 DA | 3  | up | Cytoplasm > cytoskeleton         | Connects cell membrane constituents to the actin cytoskeleton.         |
| Q14444 | CAPRN1 Caprin-1                                             | CAPRN1 | 0.84 | 78,366 DA  | 4  | up | Cytosole                         | translation of mRNAs of proteins involved in synaptic plasticity       |
| P62820 | RAB1A Ras-related protein Rab-1A                            | RAB1A  | 0.84 | 22,678 DA  | 2  | uo | Golgi ER, Cytoplasm              | regulators of intracellular membrane trafficking                       |

|        |                                                              |         |      |            |    |    |                                   |                                                                                        |
|--------|--------------------------------------------------------------|---------|------|------------|----|----|-----------------------------------|----------------------------------------------------------------------------------------|
| Q9H0U4 | RAB1B Ras-related protein Rab-1B                             | RAB1B   | 0.84 | 22,171 DA  | 2  | up | Cytoplasm membrane                | Regulators of intracellular membrane trafficking                                       |
| P62249 | RPS16 40S ribosomal protein S16                              | RPS16   | 0.84 | 16,445 DA  | 1  | up | cytosol, membrane ribosomes       | structural constituent of ribosome                                                     |
| Q9Y4L1 | HYOU1 Hypoxia up-regulated protein 1                         | HYOU1   | 0.84 | 111,335 DA | 2  | up | Endoplasmic reticulum lumen       | pivotal role in cytoprotective cellular mechanisms triggered by $\alpha 2$ deprivation |
| Q9Y2B0 | CNPY2 Protein canopy homolog 2                               | CNPY2   | 0.85 | 20,652 DA  | 1  | up | Endoplasmic reticulum             | stabilizing myosin regulatory light chain                                              |
| P30101 | PDIA3 Protein disulfide-isomerase A3                         | PDIA3   | 0.85 | 56,782 DA  | 7  | up | Endoplasmic reticulum Melanosome  | Catalyzes the rearrangement of -S-S- bonds in proteins                                 |
| Q969X5 | ERGIC1 Endoplasmic reticulum-Golgi intermediate compartment  | ERGIC1  | 0.85 | 32,592 DA  | 1  | up | EPR and G A                       | Possible role in transport between endoplasmic reticulum and Golgi apparatus           |
| P62277 | RPS13 40S ribosomal protein S13                              | RPS13   | 0.86 | 17,222 DA  | 6  | up | Cytosol                           | Structural constituents of ribosomes                                                   |
| Q03135 | CAV1 Caveolin-1                                              | CAV1    | 0.86 | 20,472 DA  | 2  | up | Golgi Cell membrane               | May act as a scaffolding protein within caveolar membranes                             |
| Q14697 | GANAB Neutral alpha-glucosidase AB                           | GANAB   | 0.86 | 106,874 DA | 2  | up | ER and Golgi A                    | This protein is involved in the pathway N-glycan metabolism                            |
| P08133 | ANXA6 Annexin A6                                             | ANXA6   | 0.86 | 75,873 DA  | 6  | up | Cytoplasm melanosomes             | May regulate the release of $Ca^{2+}$ from intracellular stores.                       |
| Q15149 | PLEC Plectin                                                 | PLEC    | 0.86 | 531,791 DA | 10 | up | Cytoskeleton cell junction        | plays a major role in the maintenance of myofiber integrity                            |
| Q12907 | LMAN2 Vesicular integral-membrane protein VIP36              | LMAN2   | 0.87 | 40,229 DA  | 1  | up | Endoplasmic Reti Golgi apparatus  | Role as intracellular lectin in the early secretory pathway                            |
| P26038 | MSN Moesin                                                   | MSN     | 0.87 | 67,820 DA  | 2  | up | Cytoplasm, Cell membrane          | inhibit herpes simplex virus 1 infection at an early stage                             |
| P35241 | RDX Radixin                                                  | RDX     | 0.87 | 52,679 DA  | 2  | up | Cytoplasm > cytoskeleton          | crucial role in the binding actin filaments to the plasma membrane                     |
| P61019 | RAB2A Ras-related protein Rab-2A                             | RAB2A   | 0.88 | 23,546 DA  | 5  | up | EPR and G A                       | protein transport from the endoplasmic reticulum to the Golgi complex                  |
| P00966 | ASS1 Argininosuccinate synthase                              | ASS1    | 0.88 | 46,530 DA  | 6  | up | Cytosol, Mitochondria Nucleus etc | Is indirectly involved in the control of blood pressure                                |
| P60709 | ACTB Actin, cytoplasmic 1                                    | ACTB    | 0.88 | 41,737 DA  | 9  | up | Cytoplasm Cytoskeleton            | involved in various types of cell motility                                             |
| Q6P2Q9 | PRPF8 Pre-mRNA-processing-splicing factor 8                  | PRPF8   | 0.88 | 273,600 DA | 1  | up | Nucleus                           | splice sites on pre-mRNA substrates                                                    |
| P23396 | RPS3 40S ribosomal protein S3                                | RPS3    | 0.88 | 26,688 DA  | 6  | up | Cytoplasm Nucleus Mitochondria    | UV radiation and induces apoptosis by caspase-dependent JNK activation                 |
| P35579 | MYH9 Myosin-9                                                | MYH9    | 0.88 | 226,532 DA | 9  | up | Cytoplasm, Cytoskeleton           | play a role in cytokinesis, cell shape                                                 |
| O00571 | DDX3X ATP-dependent RNA helicase DDX3X                       | DDX3X   | 0.88 | 73,243 DA  | 5  | up | Cytoplasm Nucleus Mitochondria    | Acts as a cofactor for XPO1-mediated nuclear export                                    |
| Q00839 | HNRNPU Heterogeneous nuclear ribonucleoprotein U             | HNRNPU  | 0.88 | 90,584 DA  | 4  | up | Cytoplasm nucleus, cell surface   | circadian regulation of the core clock component ARNTL/BMAL1                           |
| Q14157 | UBAP2L Ubiquitin-associated protein 2-like                   | UBAP2L  | 0.88 | 114,535 DA | 2  | up | PeG protein complex               | role in the activity of long-term repopulating hematopoietic stem cells                |
| O00264 | PGRMC1 Membrane-associated progesterone receptor component   | PGRMC1  | 0.89 | 21,671 DA  | 1  | up | EPR melanosome                    | Receptor for progesterone, heme binding                                                |
| P08195 | SLC3A2 4F2 cell-surface antigen heavy chain                  | SLC3A2  | 0.89 | 67,994 DA  | 7  | up | cell membrane                     | Required for the function of light chain amino-acid transporters                       |
| P15924 | DSP Desmoplakin                                              | DSP     | 0.89 | 331,774 DA | 4  | up | Cytoplasm Cemm membrane           | Involved in the organization of the desmosomal cadherin-plakoglobin complex            |
| Q15056 | EIF4H Eukaryotic translation initiation factor 4H            | EIF4H   | 0.89 | 27,385 DA  | 2  | up | Cytoplasm                         | Stimulates the RNA helicase activity of EIF4A in the translation initiation            |
| Q8NC51 | SERBP1 Plasminogen activator inhibitor 1 RNA-binding protein | SERBP1  | 0.89 | 44,965 DA  | 4  | up | Cytoplasm nucleus                 | regulation of mRNA stability                                                           |
| P62633 | CNBP Cellular nucleic acid-binding protein                   | CNBP    | 0.89 | 19,463 DA  | 1  | up | Cytoplasm EPR                     | Involved in sterol-mediated repression                                                 |
| Q9NVP1 | DDX18 ATP-dependent RNA helicase DDX18                       | DDX18   | 0.89 | 75,407 DA  | 2  | up | Nucleus                           | Probable RNA-dependent helicase                                                        |
| P55854 | SUMO3 Small ubiquitin-related modifier 3                     | SUMO3   | 0.89 | 11,637 DA  | 1  | up | Cytoplasm nucleus                 | Plays a role in the regulation of sumoylation status of SETX                           |
| Q6EEV6 | SUMO4 Small ubiquitin-related modifier 4                     | SUMO4   | 0.89 | 10,685 DA  | 1  | up | nucleus                           | activation of E1 complex SAE1-SAE2                                                     |
| P31946 | YWHAB 14-3-3 protein beta/alpha                              | YWHAB   | 0.89 | 28,082 DA  | 3  | up | Cytoplasm                         | blockage of neuronal apoptosis elicited by SRPK2                                       |
| P67809 | YBX1 Nuclease-sensitive element-binding protein 1            | YBX1    | 0.9  | 35,924 DA  | 3  | up | Cytoplasm Nucleus                 | role in DNA repair                                                                     |
| P07237 | P4HB Protein disulfide-isomerase                             | P4HB    | 0.9  | 57,116 DA  | 11 | up | EPR Cell membrane                 | altering the plasma membrane redox state and enhancing cell migration                  |
| P62244 | RPS15A 40S ribosomal protein S15a                            | RPS15A  | 0.9  | 14,840 DA  | 1  | up | Cytoplasm membrane                | structural constituent of ribosome                                                     |
| P80723 | BASP1 Brain acid soluble protein 1                           | BASP1   | 0.9  | 22,693 DA  | 4  | up | Cell membrane                     | transcription regulatory region DNA binding                                            |
| Q9BZZ5 | API5 Apoptosis inhibitor 5                                   | API5    | 0.9  | 59,005 DA  | 1  | up | Cytoplasm Nucleus                 | Its depletion enhances the cytotoxic action of the chemotherapeutic drug               |
| Q9P035 | PTPLAD1 3-hydroxyacyl-CoA dehydratase 3                      | PTPLAD1 | 0.9  | 43,160 DA  | 2  | up | EPR                               | involved in INSR internalization                                                       |
| P32969 | RPL9P9 60S ribosomal protein L9                              | RPL9P9  | 0.91 | 21,863 DA  | 7  | up | Cytoplasm membrane nucleus        | structural constituent of ribosome                                                     |
| P51991 | HNRNPA3 Heterogeneous nuclear ribonucleoprotein A3           | HNRNPA3 | 0.91 | 39,595 DA  | 5  | up | Nucleus                           | role in cytoplasmic trafficking of RNA                                                 |
| Q81YD1 | GSPT2 Eukaryotic peptide chain release factor GTP-binding    | GSPT2   | 0.91 | 68,883 DA  | 1  | up | Cytoplasm                         | play a role in cell cycle progression                                                  |
| Q09666 | AHNAK Neuroblast differentiation-associated protein AHNA     | AHNAK   | 0.91 | 629,101 DA | 15 | up | Nucleus                           | May be required for neuronal cell differentiation.                                     |



|        |                                                            |          |      |            |    |    |                                 |                                                                                     |
|--------|------------------------------------------------------------|----------|------|------------|----|----|---------------------------------|-------------------------------------------------------------------------------------|
| P23284 | PPIB Peptidyl-prolyl cis-trans isomerase B                 | PPIB     | 0.91 | 23,743 DA  | 4  | up | EPR melanosome                  | PPIases accelerate the folding of proteins                                          |
| Q96A33 | CCDC47 Coiled-coil domain-containing protein 47            | CCDC47   | 0.92 | 55,318 DA  | 1  | up | Membrane                        | calcium ion binding                                                                 |
| A6NE09 | RPSAP58 Protein RPSAP58                                    | RPSAP58  | 0.92 | NA         | 6  | up | NO data                         | No data                                                                             |
| P51571 | SSR4 Translocon-associated protein subunit delta           | SSR4     | 0.92 | 18,999 DA  | 5  | up | EPR                             | regulate the retention of ER resident proteins.                                     |
| P78347 | GTF2I General transcription factor II-I                    | GTF2I    | 0.92 | 112416 DA  | 5  | up | Cytoplasm nucleus               | Acts as a coregulator for USF1 by binding independently                             |
| P06748 | NPM1 Nucleophosmin                                         | NPM1     | 0.92 | 32,575 DA  | 7  | up | Cytoplasm Nucleus               | Involved in diverse cellular processes such as ribosome biogenesis                  |
| P46782 | RPS5 40S ribosomal protein S5                              | RPS5     | 0.92 | 22876 DA   | 2  | up | Cytosol,membrane                | structural constituent of ribosome                                                  |
| P09429 | HMGB1 High mobility group protein B1                       | HMGB1    | 0.92 | 24,894 DA  | 4  | up | Cytoplasm nucleus cell membrane | promotes recruitment of ALD-DNA to endosomes                                        |
| O75390 | CS Citrate synthase, mitochondrial                         | CS       | 0.92 | 51,712 DA  | 1  | up | Mitochondrai matrix             | synthesizes isocitrate from oxaloacetate                                            |
| P17096 | HMGA1 High mobility group protein HMGI/HMG-Y               | HMGA1    | 0.92 | 19,694 DA  | 1  | up | Nucleus Chromosomes             | involved in the transcription regulation of genes containing                        |
| P11021 | HSPA5 78 kDa glucose-regulated protein                     | HSPA5    | 0.93 | 55,010 DA  | 1  | up | Cytoplasm Apical C membrane     | Acts as the major transporter of tyrosine in fibroblasts                            |
| P22695 | UQCRC2 Cytochrome b-c1 complex subunit 2, mitochondrial    | UQCRC2   | 0.93 | 48,443 DA  | 1  | up | Mitochondrial Inner Membrane    | The core protein 2 is required for the assembly of the complex.                     |
| P12814 | ACTN1 Alpha-actinin-1                                      | ACTN1    | 0.93 | 103,058 DA | 3  | up | Cytoplasm                       | variety of intracellular structures                                                 |
| P42704 | LRPPRC Leucine-rich PPR motif-containing protein, mitocho  | LRPPRC   | 0.94 | 157,905 DA | 10 | up | Mitochondria Nucleus            | role in RNA metabolism in both nuclei and mitochondria                              |
| P26368 | U2AF2 Splicing factor U2AF 65 kDa subunit                  | U2AF2    | 0.94 | 53,501 DA  | 4  | up | Nucleus                         | Required for the export of mRNA out of the nucleus                                  |
| O60506 | SYNCRIP Heterogeneous nuclear ribonucleoprotein Q          | SYNCRIP  | 0.94 | 69,603 DA  | 8  | up | Cytoplasm EPR Nucleus           | involved in cytoplasmic vesicle-based mRNA transport                                |
| Q12905 | ILF2 Interleukin enhancer-binding factor 2                 | ILF2     | 0.94 | 43,062 DA  | 2  | up | Cytoplasm Nucleus               | promote the formation of stable DNA-dependent protein kinase                        |
| Q14980 | NUMA1 Nuclear mitotic apparatus protein 1                  | NUMA1    | 0.94 | 238,260 DA | 2  | up | Cytoplasm nucleus chromosome    | proper alignment of the mitotic spindle during asymmetric cell division             |
| Q07065 | CKAP4 Cytoskeleton-associated protein 4                    | CKAP4    | 0.95 | 66,022 DA  | 8  | up | EPR Cell membrane               | anchoring of the endoplasmic reticulum to microtubules.                             |
| P62913 | RPL11 60S ribosomal protein L11                            | RPL11    | 0.95 | 20,252 DA  | 1  | up | Nucleus                         | Required for rRNA maturation and formation of the 60S ribosomal subunit             |
| P62873 | GNB1 Guanine nucleotide-binding protein G(I)/G(S)/G(T)     | GNB1     | 0.95 | 37,377 DA  | 1  | up | Cytosol membrane sheath         | involved as transducer in various transmembrane signaling systems                   |
| P62879 | GNB2 Guanine nucleotide-binding protein G(I)/G(S)/G(T)     | GNB2     | 0.95 | 37,331 DA  | 1  | up | Cytoplasm                       | involved as transducer in various transmembrane signaling systems                   |
| Q9HAV0 | GNB4 Guanine nucleotide-binding protein subunit beta-4     | GNB4     | 0.95 | 37567 DA   | 1  | up | Organelle membrane              | involved as transducer in various transmembrane signaling systems                   |
| P07954 | FH Fumarate hydratase, mitochondrial                       | FH       | 0.95 | 54,637 DA  | 2  | up | Cytoplasm Mitochondria          | Acts as a tumor suppressor                                                          |
| P14625 | HSP90B1 Endoplasmic                                        | HSP90B1  | 0.95 | 92,469 DA  | 8  | up | EPR melanosomes                 | EPR associated degradation (ERAD). Has ATPase activity                              |
| P13667 | PDIA4 Protein disulfide-isomerase A4                       | PDIA4    | 0.96 | 72,932 DA  | 4  | up | EPR melanosome                  | Catalyzes the rearrangement of -S-S- bonds in protein                               |
| Q96N66 | MBOAT7 Lysophospholipid acyltransferase 7                  | MBOAT7   | 0.96 | 44733 DA   | 1  | up | Membrane                        | catalyze the reacylation step of the phospholipid remodeling pathway                |
| O75844 | ZMPSTE24 CAAX prenyl protease 1 homolog                    | ZMPSTE24 | 0.96 | 54,813 DA  | 2  | up | Membrane of EPR and GA          | Proteolytically removes the C-terminal three residues of farnesylated proteins      |
| P23246 | SFPQ Splicing factor, proline- and glutamine-rich          | SFPQ     | 0.97 | 76,149 DA  | 5  | up | Cytoplasm Nucleus               | transcriptional repression of circadian target genes, such as PER1                  |
| P10809 | HSPD1 60 kDa heat shock protein, mitochondrial             | HSPD1    | 0.97 | 61,055 DA  | 15 | up | Mitochondria Matrix             | May also prevent misfolding and promote the refolding                               |
| Q00325 | SLC25A3 Phosphate carrier protein, mitochondrial           | SLC25A3  | 0.97 | 40,095 DA  | 3  | up | Mitochondrai Inner membrane     | role regulation of the mitochondrial permeability transition pore                   |
| Q01650 | SLC7A5 Large neutral amino acids transporter small subunit | SLC7A5   | 0.98 | 55,010 Da  | 1  | up | Cytoplasm Cell membrane         | Acts as the major transporter of tyrosine in fibroblasts.                           |
| P37198 | NUP62 Nuclear pore glycoprotein p62                        | NUP62    | 0.98 | 53,255 DA  | 1  | up | Cytoplasm Nucleus               | Involved in nucleocytoplasmic transport                                             |
| Q96GQ7 | DDX27 Probable ATP-dependent RNA helicase DDX27            | DDX27    | 0.98 | 89,835 DA  | 1  | up | Nucleus                         | Probable ATP-dependent RNA helicase                                                 |
| P38646 | HSPA9 Stress-70 protein, mitochondrial                     | HSPA9    | 0.98 | 73,680 DA  | 14 | up | Mitochondria Nucleus            | cell proliferation and cellular aging                                               |
| Q9Y277 | VDAC3 Voltage-dependent anion-selective channel protein    | VDAC3    | 0.98 | 30,659 DA  | 2  | up | Mitochondrial membrane          | membrane that allows diffusion of small hydrophilic molecules                       |
| P50454 | SERPINH1 Serpin H1                                         | SERPINH1 | 0.98 | 46,441 DA  | 6  | up | EPR                             | involved as a chaperone in the biosynthetic pathway of collagen                     |
| Q9Y676 | MRPS18B 28S ribosomal protein S18b, mitochondrial          | MRPS18B  | 0.99 | 29,396 DA  | 1  | up | Mitochondrial                   | structural constituent of ribosome                                                  |
| P63244 | GNB2L1 Guanine nucleotide-binding protein subunit beta-2-  | GNB2L1   | 0.99 | 35077 DA   | 5  | up | Cytoplasm Nucleus membrane      | Promotes migration of breast carcinoma cells by binding to and activating integrins |
| Q7KZF4 | SND1 Staphylococcal nuclease domain-containing protein     | SND1     | 0.99 | 101,997 DA | 2  | up | Cytoplasm Nucleus Melanosome    | Transcriptional coactivator for the Epstein-Barr virus nuclear antigen 2            |
| Q15084 | PDIA6 Protein disulfide-isomerase A6                       | PDIA6    | 0.99 | 48,121 DA  | 8  | up | EPR Cytoplasm                   | inhibits aggregation of misfolded proteins                                          |
| P61978 | HNRNP K Heterogeneous nuclear ribonucleoprotein K          | HNRNP K  | 1    | 50,976 DA  | 14 | up | Cytoplasm Nucleus               | Induction of apoptosis, but not cell cycle arrest                                   |
| P01891 | HLA-A HLA class I histocompatibility antigen, A-68 alpha   | HLA-A    | 1    | 40,909 DA  | 2  | up | Membrane                        | Involved in the presentation of foreign antigens to the immune system.              |

|        |                                                          |           |      |            |    |    |                                     |                                                                             |
|--------|----------------------------------------------------------|-----------|------|------------|----|----|-------------------------------------|-----------------------------------------------------------------------------|
| P01892 | HLA-A HLA class I histocompatibility antigen, A-2 alpha  | HLA-A     | 1    | 40,922 DA  | 2  | up | Membrane                            | Involved in the presentation of foreign antigens to the immune system.      |
| P04439 | HLA-A HLA class I histocompatibility antigen, A-3 alpha  | HLA-A     | 1    | 40,841 DA  | 2  | up | membrane                            | nvolved in the presentation of foreign antigens to the immune system        |
| P05534 | HLA-A HLA class I histocompatibility antigen, A-24 alpha | HLA-A     | 1    | 40,689 DA  | 2  | up | membrane                            | nvolved in the presentation of foreign antigens to the immune system        |
| P10314 | HLA-A HLA class I histocompatibility antigen, A-32 alpha | HLA-A     | 1    | 41,048 DA  | 2  | up | membrane                            | Involved in the presentation of foreign antigens to the immune system.      |
| P16188 | HLA-A HLA class I histocompatibility antigen, A-30 alpha | HLA-A     | 1    | 40,905 DA  | 2  | up | membrane                            | Involved in the presentation of foreign antigens to the immune system.      |
| P16189 | HLA-A HLA class I histocompatibility antigen, A-31 alpha | HLA-A     | 1    | 41,004 DA  | 2  | up | membrane                            | nvolved in the presentation of foreign antigens to the immune system        |
| P18462 | HLA-A HLA class I histocompatibility antigen, A-25 alpha | HLA-A     | 1    | 41,218 DA  | 2  | up | membrane                            | nvolved in the presentation of foreign antigens to the immune system        |
| P30443 | HLA-A HLA class I histocompatibility antigen, A-1 alpha  | HLA-A     | 1    | 40,846 DA  | 2  | up | membrane                            | Involved in the presentation of foreign antigens to the immune system.      |
| P30453 | HLA-A HLA class I histocompatibility antigen, A-34 alpha | HLA-A     | 1    | 41,055 DA  | 2  | up | membrane                            | Involved in the presentation of foreign antigens to the immune system.      |
| P30456 | HLA-A HLA class I histocompatibility antigen, A-43 alpha | HLA-A     | 1    | 41,033 DA  | 2  | up | membrane                            | nvolved in the presentation of foreign antigens to the immune system        |
| P30459 | HLA-A HLA class I histocompatibility antigen, A-74 alpha | HLA-A     | 1    | 40,891 DA  | 2  | up | membrane                            | nvolved in the presentation of foreign antigens to the immune system        |
| P30512 | HLA-A HLA class I histocompatibility antigen, A-29 alpha | HLA-A     | 1    | 40,863 DA  | 2  | up | membrane                            | Involved in the presentation of foreign antigens to the immune system.      |
| Q29960 | HLA-C HLA class I histocompatibility antigen, Cw-16 alph | HLA-C     | 1    | 40,753 DA  | 2  | up | membrane                            | Involved in the presentation of foreign antigens to the immune system.      |
| Q95604 | HLA-C HLA class I histocompatibility antigen, Cw-17 alph | HLA-C     | 1    | 41,238 DA  | 2  | up | membrane                            | nvolved in the presentation of foreign antigens to the immune system        |
| P05387 | RPLP2 60S acidic ribosomal protein P2                    | RPLP2     | 1    | 11,665 DA  | 4  | up | Cytosol Membrane                    | Plays an important role in the elongation step of protein synthesis.        |
| Q16630 | CPSF6 Cleavage and polyadenylation specificity factor su | CPSF6     | 1    | 59,210 DA  | 4  | up | Nucleus                             | Involved in association with NUDT21/CPSF5 in pre-mRNA 3'-end pol            |
| P39656 | DDOST Dolichyl-diphosphooligosaccharide--protein glycosy | DDOST     | 1    | 50,801 DA  | 2  | up | EPR                                 | This protein is involved in the pathway protein glycosylation               |
| O60488 | ACSL4 Long-chain-fatty-acid--CoA ligase 4                | ACSL4     | 1    | 79,188 DA  | 1  | up | Membrane of Mitochondria EPR        | synthesis of cellular lipids, and degradation via beta-oxidation            |
| O95573 | ACSL3 Long-chain-fatty-acid--CoA ligase 3                | ACSL3     | 1    | 80,420 DA  | 1  | up | Membrane of Mitochondria EPR        | both synthesis of cellular lipids, and degradation via beta-oxidation       |
| Q13283 | G3BP1 Ras GTPase-activating protein-binding protein 1    | G3BP1     | 1.01 | 52,164 DA  | 1  | up | Cytoplasm Cell membrane Nucleus     | May be a regulated effector of stress granule assembly                      |
| P45880 | VDAC2 Voltage-dependent anion-selective channel protein  | VDAC2     | 1.01 | 31,567 DA  | 6  | up | Mitochondrial membrane              | Allows diffusion of small hydrophilic molecules                             |
| Q6YN16 | HSDL2 Hydroxysteroid dehydrogenase-like protein 2        | HSDL2     | 1.01 | 45,395 DA  | 1  | up | Peroxisome                          | Has apparently no steroid dehydrogenase activity                            |
| Q9H7Z7 | PTGES2 Prostaglandin E synthase 2                        | PTGES2    | 1.02 | 41,943 DA  | 2  | up | GA membrane                         | Isomerase that catalyzes the conversion of PGH2 into the more stable p      |
| Q13148 | TARDBP TAR DNA-binding protein 43                        | TARDBP    | 1.02 | 44,740 DA  | 4  | up | Nucleus                             | nvolved in the regulation of CFTR splicing                                  |
| Q13813 | SPTAN1 Spectrin alpha chain, non-erythrocytic 1          | SPTAN1    | 1.02 | 284,539 DA | 2  | up | Cytoplasm                           | calcium-dependent movement of the cytoskeleton at the membrane              |
| Q16836 | HADH Hydroxyacyl-coenzyme A dehydrogenase, mitochondria  | HADH      | 1.03 | 34,294 DA  | 1  | up | Mitochondrian Matrix                | mitochondrial beta-oxidation of short chain fatty acids                     |
| P31943 | HNRNPH1 Heterogeneous nuclear ribonucleoprotein H        | HNRNPH1   | 1.03 | 49,229 DA  | 9  | up | Nucleus                             | Inhibits, together with CUGBP1, insulin receptor (IR) pre-mRNA exon         |
| O43390 | HNRNPR Heterogeneous nuclear ribonucleoprotein R         | HNRNPR    | 1.04 | 70,943 DA  | 6  | up | Nucleus Cytoplasm                   | Play an important role in processing of precursor mRNA in the nucleus       |
| P25705 | ATP5A1 ATP synthase subunit alpha, mitochondrial         | ATP5A1    | 1.04 | 59,751 DA  | 15 | up | Mitochondrial matrix membrane       | Mitochondrial membrane ATP synthase                                         |
| Q07021 | C1QBP Complement component 1 Q subcomponent-binding prot | C1QBP     | 1.04 | 31,362 DA  | 7  | up | Cytoplasm, Nucleus ,mitochondria cm | Involved in regulation of antiviral response by inhibiting DDX58- and I     |
| Q9Y3C1 | NOPI6 Nucleolar protein 16                               | NOPI6     | 1.04 | 21,188 DA  | 1  | up | Nucleus                             | ribosomal large subunit biogenesis                                          |
| Q96PK6 | RBM14 RNA-binding protein 14                             | RBM14     | 1.05 | 69,492 DA  | 1  | up | Nucleus                             | transcriptional repressor                                                   |
| P04844 | RPN2 Dolichyl-diphosphooligosaccharide--protein glycosy  | RPN2      | 1.05 | 69,284 DA  | 7  | up | EPR                                 | transfer of a high mannose oligosaccharide from a lipid-linked              |
| P26599 | PTBP1 Polypyrimidine tract-binding protein 1             | PTBP1     | 1.05 | 57,221 DA  | 11 | up | Nucleus                             | role in pre-mRNA splicing and in the regulation of alternative splicing     |
| P21796 | VDAC1 Voltage-dependent anion-selective channel protein  | VDAC1     | 1.05 | 30,773 DA  | 6  | up | Mitochondrial Membrane Cell membr   | responsible for the release of mitochondrial products that triggers apopt   |
| P05388 | RPLP0 60S acidic ribosomal protein P0                    | RPLP0     | 1.05 | 34,274 DA  | 8  | up | Cytoplasm Nucleus                   | structural constituent of ribosome                                          |
| P49411 | TUFM Elongation factor Tu, mitochondrial                 | TUFM      | 1.05 | 49,542 DA  | 1  | up | Mitochondria                        | A-site of ribosomes during protein biosynthesis.                            |
| Q15366 | PCBP2 Poly(rC)-binding protein 2                         | PCBP2     | 1.05 | 38,580 DA  | 2  | up | Nucleus Cytoplasm                   | role in initiation of viral RNA replication in concert with the viral prote |
| P22626 | HNRNPA2B1 Heterogeneous nuclear ribonucleoproteins A2/B1 | HNRNPA2B1 | 1.06 | 37,430 DA  | 14 | up | Cytoplasm Nucleus                   | Involved in miRNA sorting into exosomes following sumoylation               |
| P09651 | HNRNPA1 Heterogeneous nuclear ribonucleoprotein A1       | HNRNPA1   | 1.06 | 38,747 DA  | 10 | up | Cytoplasm Nucleus                   | play a role in HCV RNA replication                                          |
| P27824 | CANX Calnexin                                            | CANX      | 1.06 | 67,568 DA  | 10 | up | EPR membrane                        | It may act in assisting protein assembly                                    |
| P62888 | RPL30 60S ribosomal protein L30                          | RPL30     | 1.06 | 12,784 DA  | 3  | up | Cytoplasm Nucleus Membrane          | structural constituent of ribosome                                          |
| P16615 | ATP2A2 Sarcoplasmic/endoplasmic reticulum calcium ATPase | ATP2A2    | 1.07 | 114,757 DA | 2  | up | EPR SPR                             | involved in the regulation of the contraction/relaxation cycle              |

|        |                                                                        |                |      |            |    |    |                                |                                                                                                           |
|--------|------------------------------------------------------------------------|----------------|------|------------|----|----|--------------------------------|-----------------------------------------------------------------------------------------------------------|
| Q14103 | HNRNPD Heterogeneous nuclear ribonucleoprotein D0                      | HNRNPD         | 1.08 | 38,434 DA  | 2  | up | cytoplasm Nucleus              | involved in the regulation of PER2 translation                                                            |
| Q99729 | HNRNPAB Heterogeneous nuclear ribonucleoprotein A/B                    | HNRNPAB        | 1.08 | 36,225 DA  | 5  | up | Nucleus Cytoplasm              | binds to APOB mRNA transcripts around the RNA editing site                                                |
| P38159 | RBMX RNA-binding motif protein, X chromosome                           | RBMX           | 1.08 | 42,332 DA  | 3  | up | Nucleus                        | Plays also a role in the cytoplasmic TNFR1 trafficking pathways                                           |
| P17844 | DDX5 Probable ATP-dependent RNA helicase DDX5                          | DDX5           | 1.09 | 69,148 DA  | 5  | up | Nucleus                        | Involved in the alternative regulation of pre-mRNA splicing                                               |
| Q92841 | DDX17 Probable ATP-dependent RNA helicase DDX17                        | DDX17          | 1.09 | 80,272 DA  | 2  | up | Nucleus                        | mediated mRNA degradation                                                                                 |
| P34897 | SHMT2 Serine hydroxymethyltransferase, mitochondrial                   | SHMT2          | 1.09 | 55,993 DA  | 2  | up | Mitochondria cytoplasm Nucleus | Contributes to the de novo mitochondrial thymidylate biosynthesis                                         |
| Q08211 | DHX9 ATP-dependent RNA helicase A                                      | DHX9           | 1.1  | 140,958 DA | 8  | up | Nucleus Cytoplasm              | Unwinds double-stranded DNA and RNA in a 3' to 5' direction                                               |
| P52597 | HNRNPF Heterogeneous nuclear ribonucleoprotein F                       | HNRNPF         | 1.1  | 45,672 DA  | 7  | up | Nucleus                        | role in the regulation of alternative splicing events                                                     |
| P43243 | MATR3 Matrin-3                                                         | MATR3          | 1.1  | 94,623 DA  | 3  | up | Nucleus Matrix                 | play a role in transcription or may interact with other nuclear matrix proteins                           |
| P31327 | CPS1 Carbamoyl-phosphate synthase                                      | CPS1           | 1.1  | 164,939 DA | 18 | up | Mitochondria Nucleus           | role in removing excess ammonia from the cell.                                                            |
| O14880 | MGST3 Microsomal glutathione S-transferase 3                           | MGST3          | 1.1  | 16,516 DA  | 2  | up | EPR                            | Also functions as a glutathione peroxidase.                                                               |
| P54709 | ATP1B3 Sodium/potassium-transporting ATPase subunit beta-              | ATP1B3         | 1.1  | 74,176 DA  | 1  | up | Mitochondrial membrane         | May have a function in the urea cycle                                                                     |
| P61026 | RAB10 Ras-related protein Rab-10                                       | RAB10          | 1.11 | 22,541 DA  | 1  | up | EPR GA                         | EPR dynamics, morphology controlling tubulation along microtubules                                        |
| P02545 | LMNA Prelamin-A/C                                                      | LMNA           | 1.11 | 74,139 DA  | 8  | up | Nucleus                        | It acts to disrupt mitosis and induce DNA damage                                                          |
| P99999 | CYCS Cytochrome c                                                      | CYCS           | 1.11 | 11,749 DA  | 1  | up | Mitochondrial membrane         | activation of caspase-9, which accelerates apoptosis by activating other caspases                         |
| Q9BVC6 | TMEM109 Transmembrane protein 109                                      | TMEM109        | 1.11 | 26,210 DA  | 1  | up | EPR Nuclear membrane           | Can form voltage-gated calcium and potassium channels in vitro                                            |
| P54886 | ALDH18A1 Delta-1-pyrroline-5-carboxylate synthase                      | ALDH18A1       | 1.12 | 87,302 DA  | 2  | up | Mitochondrial membrane         | Biosynthesis of proline, ornithine and arginine                                                           |
| P98179 | RBM3 Putative RNA-binding protein 3                                    | RBM3           | 1.14 | 17,170 DA  | 1  | up | Cytoplasm Nucleus              | enhances protein synthesis at both physiological and mild hypothermic temperatures                        |
| P62081 | RPS7 40S ribosomal protein S7                                          | RPS7           | 1.14 | 22,127 DA  | 8  | up | Cytoplasm                      | Required for rRNA maturation                                                                              |
| O14548 | COX7A2L Cytochrome c oxidase subunit 7A-related protein, mitochondrial | COX7A2L        | 1.14 | 12,615 DA  | 1  | up | Mitochondrial inner membrane   | Involved in the regulation of oxidative phosphorylation and energy metabolism                             |
| Q10471 | GALNT2 Polypeptide N-acetylgalactosaminyltransferase 2                 | GALNT2         | 1.15 | 64,733 DA  | 4  | up | Golgi Apparatus                | involved in immunoglobulin A1 (IgA1) hinge region                                                         |
| O43143 | DHX15 Putative pre-mRNA-splicing factor ATP-dependent RN               | DHX15          | 1.15 | 90,933 DA  | 1  | up | Nucleus                        | involved in disassembly of spliceosomes after the release of mature mRNA                                  |
| P31942 | HNRNPH3 Heterogeneous nuclear ribonucleoprotein H3                     | HNRNPH3        | 1.16 | 36,926 DA  | 1  | up | Nucleus                        | splicing process and participates in early heat shock-induced splicing activation                         |
| O43169 | CYB5B Cytochrome b5 type B                                             | CYB5B          | 1.16 | 16,332 DA  | 2  | up | Mitochondria membrane          | function as an electron carrier for several membrane bound oxygenases                                     |
| O75643 | SNRNP200 U5 small nuclear ribonucleoprotein 200 kDa helicas            | SNRNP200       | 1.16 | 244,508 DA | 2  | up | Nucleus                        | essential step in the assembly of a catalytically active spliceosome                                      |
| P36957 | DLST Dihydropyridyllysine-residue succinyltransferase co               | DLST           | 1.16 | 48,755 DA  | 1  | up | Mitochondria                   | Involves in lipamide dehydrogenase                                                                        |
| P39748 | FEN1 Flap endonuclease 1                                               | FEN1           | 1.17 | 42,593 DA  | 1  | up | Nucleus                        | involved in replication and repair of rDNA and in repairing mitochondrial DNA                             |
| Q9NR30 | DDX21 Nucleolar RNA helicase 2                                         | DDX21          | 1.17 | 87,344 DA  | 8  | up | Nucleus Cytoplasm              | Involved in rRNA processing                                                                               |
| O14974 | PPP1R12A Protein phosphatase 1 regulatory subunit 12A                  | PPP1R12A       | 1.17 | 115,281 DA | 1  | up | Cytoplasm                      | involved in dephosphorylation of PLK1                                                                     |
| O00159 | MYO1C Unconventional myosin-1c                                         | MYO1C          | 1.18 | 121,682 DA | 2  | up | Cytoplasm nucleus              | Binds phosphoinositides and links the actin cytoskeleton to cellular membranes                            |
| P06576 | ATP5B ATP synthase subunit beta, mitochondrial                         | ATP5B          | 1.19 | 56,560 DA  | 9  | up | trtarsubunit beta, mitochondr  | Mitochondrial membrane ATP synthase                                                                       |
| Q02218 | OGDH 2-oxoglutarate dehydrogenase, mitochondrial                       | OGDH           | 1.19 | 115,935 DA | 2  | up | Mitochondrial matrix           | Regulate lipamide dehydrogenase                                                                           |
| Q99623 | PHB2 Prohibitin-2                                                      | PHB2           | 1.21 | 33,296 DA  | 6  | up | Cytoplasm Mitochondria Nucleus | Probably involved in regulating mitochondrial respiration activity and in mitochondrial membrane dynamics |
| P12236 | SLC25A6 ADP/ATP translocase 3                                          | SLC25A6        | 1.22 | 32,866 DA  | 7  | up | Mitochondria Inner mem         | responsible for the release of mitochondrial products that triggers apoptosis                             |
| Q9UJS0 | SLC25A13 Calcium-binding mitochondrial carrier protein Aral            | SLC25A13       | 1.24 | 74,176 DA  | 1  | up | Mitochondria Inner mem         | May have a function in the urea cycle                                                                     |
| P09874 | PARP1 Poly                                                             | PARP1          | 1.24 | 113,084 DA | 4  | up | Nucleus                        | Involved in the base excision repair (BER) pathway                                                        |
| P15880 | RPS2 40S ribosomal protein S2                                          | RPS2           | 1.24 | 31,324 DA  | 1  | up | Cytoplasm membrane nucleus     | structural constituent of ribosome                                                                        |
| P13804 | ETFA Electron transfer flavoprotein subunit alpha, mito                | ETFA           | 1.24 | 35,080 DA  | 1  | up | Mitochondrial matrix           | It transfers the electrons to the main mitochondrial respiratory chain via ubiquinone                     |
| Q99714 | HSD17B10 3-hydroxyacyl-CoA dehydrogenase type-2                        | HSD17B10       | 1.25 | 26,923 DA  | 4  | up | Mitochondria                   | contribute to the neuronal dysfunction associated with Alzheimer disease                                  |
| Q16563 | SYPL1 Synaptophysin-like protein 1                                     | SYPL1          | 1.27 | 28,565 DA  | 1  | up | Cytoplasm membrane             | transporter activity                                                                                      |
| Q96AG4 | LRRCS9 Leucine-rich repeat-containing protein 59                       | LRRCS9         | 1.27 | 34,930 DA  | 1  | up | EPR Nucleus                    | Required for nuclear import of FGF1                                                                       |
| J3QL51 | RPL17-C18ORF32 Protein RPL17-C18ORF32                                  | RPL17-C18ORF32 | 1.28 | 21,397 DA  | 2  | up | Cytosol Nucleus                | structural constituent of ribosome                                                                        |
| P18621 | RPL17 60S ribosomal protein L17                                        | RPL17          | 1.28 | 21,397 DA  | 2  | up | Cytosol Nucleus                | structural constituent of ribosome                                                                        |

|        |                                                           |           |      |            |   |               |                                |                                                                                                                   |
|--------|-----------------------------------------------------------|-----------|------|------------|---|---------------|--------------------------------|-------------------------------------------------------------------------------------------------------------------|
| Q9BSJ8 | ESYT1 Extended synaptotagmin-1                            | ESYT1     | 1.29 | 122,856 DA | 3 | up            | EPR Cell membrane              | promotes the formation of appositions between the ER and the cell membrane                                        |
| P05141 | SLC25A5 ADP/ATP translocase 2                             | SLC25A5   | 1.3  | 32,852 DA  | 8 | up            | Mitochondria Inner membrane    | play a role in chromosome segregation                                                                             |
| Q9NVH1 | DNAJC11 DnaJ homolog subfamily C member 11                | DNAJC11   | 1.3  | 63,278 DA  | 2 | up            | Mitochondria                   | Acts as Chaperon                                                                                                  |
| Q9UQ80 | PA2G4 Proliferation-associated protein 2G4                | PA2G4     | 1.31 | 43,787 DA  | 1 | up            | Nucleus Cytoplasm              | Regulates cell proliferation, differentiation, and survival                                                       |
| P62263 | RPS14 40S ribosomal protein S14                           | RPS14     | 1.32 | 16,273 DA  | 1 | up            | Cytoplasm Mitochondria Nucleus | structural constituent of ribosome                                                                                |
| Q02543 | RPL18A 60S ribosomal protein L18a                         | RPL18A    | 1.32 | 20,762 DA  | 1 | up            | Cytosol membrane               | Structural constituent of ribosome                                                                                |
| P34932 | HSPA4 Heat shock 70 kDa protein 4                         | HSPA4     | 1.33 | 94,331 DA  | 1 | up            | Cytoplasm                      | ATP binding                                                                                                       |
| Q96EP5 | DAZAP1 DAZ-associated protein 1                           | DAZAP1    | 1.33 | 43,383 DA  | 1 | up            | Nucleus Cytoplasm              | RNA-binding protein, which may be required during spermatogenesis.                                                |
| P11388 | TOP2A DNA topoisomerase 2-alpha                           | TOP2A     | 1.35 | 174,385 DA | 1 | up            | Nucleus Cytoplasm              | regulating the period length of ARNTL/BMAL1 transcriptional oscillation                                           |
| P52272 | HNRNPM Heterogeneous nuclear ribonucleoprotein M          | HNRNPM    | 1.35 | 77,516 DA  | 1 | up            | Nucleus                        | may initiate a series of signaling events leading to tumor necrosis factor production                             |
| O14979 | HNRPDL Heterogeneous nuclear ribonucleoprotein D-like     | HNRPDL    | 1.36 | 46,438 DA  | 4 | up            | Nucleus Cytoplasm              | Acts as a transcriptional regulator. Promotes transcription repression.                                           |
| P57053 | H2BFS Histone H2B type F-S                                | H2BFS     | 1.37 | 13,944 DA  | 4 | up            | Nucleus cytoplasm              | modifications of histones, also called histone code, and nucleosome remodeling                                    |
| Q5QNW6 | HIST2H2BF Histone H2B type 2-F                            | HIST2H2BF | 1.37 | 13,920 DA  | 4 | up            | Nucleus Chromosomes            | modifications of histones, also called histone code, and nucleosome remodeling                                    |
| Q99879 | HIST1H2BM Histone H2B type 1-M                            | HIST1H2BM | 1.37 | 13,989 DA  | 4 | up            | Nucleus Chromosomes            | modifications of histones, also called histone code, and nucleosome remodeling                                    |
| Q99880 | HIST1H2BL Histone H2B type 1-L                            | HIST1H2BL | 1.37 | 13,952 DA  | 4 | up            | Nucleus Chromosomes            | modifications of histones, also called histone code, and nucleosome remodeling                                    |
| P18754 | RCC1 Regulator of chromosome condensation                 | RCC1      | 1.37 | 44,969 DA  | 1 | up            | Nucleus Cytoplasm              | role in nucleo-cytoplasmic transport, mitosis and nuclear-envelope assembly                                       |
| P43307 | SSR1 Translocon-associated protein subunit alpha          | SSR1      | 1.38 | 32,235 DA  | 1 | up            | EPR                            | involved in the recycling of the translocation apparatus                                                          |
| Q16629 | SRSF7 Serine/arginine-rich splicing factor 7              | SRSF7     | 1.38 | 27,367 DA  | 2 | up            | Nucleus Cytoplasm              | Required for pre-mRNA splicing                                                                                    |
| P61513 | RPL37A 60S ribosomal protein L37a                         | RPL37A    | 1.39 | 10,275 DA  | 1 | up            | Cytosol Nucleus                | structural constituent of ribosome                                                                                |
| O75494 | SRSF10 Serine/arginine-rich splicing factor 10            | SRSF10    | 1.4  | 31,301 DA  | 1 | up            | Nucleus Cytoplasm              | regulation of alternative splicing in neurons, with isoform                                                       |
| Q15393 | SF3B3 Splicing factor 3B subunit 3                        | SF3B3     | 1.41 | 135,577 DA | 2 | up            | Nucleus                        | splicing of rare class of nuclear pre-mRNA intron                                                                 |
| Q15233 | NONO Non-POU domain-containing octamer-binding protein    | NONO      | 1.45 | 54,232 DA  | 2 | up            | Nucleus                        | DNA- and RNA binding protein, involved in several nuclear processes                                               |
| Q8IU66 | HIST2H2AB Histone H2A type 2-B                            | HIST2H2AB | 1.46 | 13,995 DA  | 2 | up            | Nucleus chromosomes            | modifications of histones, also called histone code, and nucleosome remodeling                                    |
| P46778 | RPL21 60S ribosomal protein L21                           | RPL21     | 1.48 | 18,565 DA  | 3 | up            | Cytoplasm Nucleus membrane     | structural constituent of ribosome                                                                                |
| P02786 | TFRC Transferrin receptor protein 1                       | TFRC      | 1.49 | 84,871 DA  | 5 | up            | Cell membrane melanosomes      | Acts as a receptor for new-world arenaviruses                                                                     |
| P16104 | H2AFX Histone H2A.x                                       | H2AFX     | 1.5  | 15,145 DA  | 6 | downregulated | Nucleus chromosomes            | Histones play a central role in transcription regulation, DNA repair, DNA replication, and cell cycle progression |
| Q96QV6 | HIST1H2AA Histone H2A type 1-A                            | HIST1H2AA | 1.5  | 14,234 DA  | 6 | downregulated | Nucleus chromosomes            | modifications of histones, also called histone code, and nucleosome remodeling                                    |
| P35268 | RPL22 60S ribosomal protein L22                           | RPL22     | 1.52 | 14,787 DA  | 1 | downregulated | cytoplasm nucleus              | structural constituent of ribosome                                                                                |
| P40926 | MDH2 Malate dehydrogenase, mitochondrial                  | MDH2      | 1.52 | 35,503 DA  | 6 | downregulated | Mitochondrial Matrix           | Enzyme activity is enhanced by acetylation                                                                        |
| P11940 | PABPC1 Polyadenylate-binding protein 1                    | PABPC1    | 1.54 | 70,671 DA  | 2 | downregulated | Cytoplasm Nucleus              | Involved in cytoplasmic regulatory processes of mRNA metabolism                                                   |
| Q13310 | PABPC4 Polyadenylate-binding protein 4                    | PABPC4    | 1.54 | 70,783 DA  | 2 | downregulated | Cytoplasm                      | involved in cytoplasmic regulatory processes of mRNA metabolism                                                   |
| O15260 | SURF4 Surfitei locus protein 4                            | SURF4     | 1.57 | 30,394 DA  | 1 | downregulated | EPR GA                         | Architecture of the EPR intermediate compartment and of the Golgi apparatus                                       |
| P62158 | CALM3 Calmodulin                                          | CALM3     | 1.58 | 16,838 DA  | 1 | downregulated | Cytoplasm                      | regulates the centrosome cycle and progression through cytokinesis                                                |
| P62910 | RPL32 60S ribosomal protein L32                           | RPL32     | 1.63 | 15,860 DA  | 1 | downregulated | Cytosol membrane               | structural constituent of ribosome                                                                                |
| P46783 | RPS10 40S ribosomal protein S10                           | RPS10     | 1.65 | 18,898 DA  | 1 | downregulated | Cytoplasm Nucleus              | Component of the 40S ribosomal subunit.                                                                           |
| P05386 | RPLP1 60S acidic ribosomal protein P1                     | RPLP1     | 1.66 | 11,514 DA  | 2 | downregulated | Cytoplasm                      | Plays an important role in the elongation step of protein synthesis                                               |
| P0C088 | HIST1H2AM Histone H2A type 1                              | HIST1H2AM | 1.72 | 14,091 DA  | 1 | downregulated | Nucleus Chromosomes            | modifications of histones, also called histone code, and nucleosome remodeling                                    |
| Q16777 | HIST2H2AC Histone H2A type 2-C                            | HIST2H2AC | 1.72 | 13,988 DA  | 1 | downregulated | Nucleus Chromosomes            | modifications of histones, also called histone code, and nucleosome remodeling                                    |
| Q9BTM1 | H2AFJ Histone H2A.J                                       | H2AFJ     | 1.72 | 14,019 DA  | 1 | downregulated | Nucleus Chromosomes            | Histones, also called histone code, and nucleosome remodeling.                                                    |
| Q7L7L0 | HIST3H2A Histone H2A type 3                               | HIST3H2A  | 1.72 | 14,121 DA  | 5 | downregulated | Nucleus chromosomes            | modifications of histones, also called histone code, and nucleosome remodeling                                    |
| P07602 | PSAP Proactivator polypeptide                             | PSAP      | 1.73 | 58,113 DA  | 1 | downregulated | Lysosomes                      | sequential action of specific hydrolases                                                                          |
| P18124 | RPL7 60S ribosomal protein L7                             | RPL7      | 1.87 | 29,226 DA  | 2 | downregulated | Cytoplasm Nucleus Membrane     | Plays a regulatory role in the translation apparatus; inhibits cell-free translation                              |
| O60812 | HNRNPCL1 Heterogeneous nuclear ribonucleoprotein C-like 1 | HNRNPCL1  | 1.96 | 32,142 DA  | 1 | downregulated | Nucleus                        | May play a role in nucleosome assembly by neutralizing basic proteins                                             |

|        |                                                       |         |      |           |   |                |                        |                                                                |
|--------|-------------------------------------------------------|---------|------|-----------|---|----------------|------------------------|----------------------------------------------------------------|
| P07910 | HNRNPC Heterogeneous nuclear ribonucleoproteins C1/C2 | HNRNPC  | 1.96 | 33,670 DA | 1 | downregulated  | Nucleus                | stability and the level of translation of bound mRNA molecules |
| P47914 | RPL29 60S ribosomal protein L29                       | RPL29   | 1.98 | 17,752 DA | 1 | downregulated  | Cytosol membrane       | structural constituent of ribosome                             |
| Q02878 | RPL6 60S ribosomal protein L6                         | RPL6    | 2.15 | 32,728 DA | 2 | Downregulated  | Cytosol Nucleus        | structural constituent of ribosome                             |
| P62241 | RPS8 40S ribosomal protein S8                         | RPS8    | 2.21 | 24,205 DA | 3 | Downregulated  | Cytoplasm membrane     | structural constituent of ribosome                             |
| P61604 | HSPE1 10 kDa heat shock protein, mitochondrial        | HSPE1   | 2.25 | 10,932 DA | 1 | Downregulated  | Mitochondrion matrix   | suppresses the ATPase activity of the latter                   |
| P0C0S5 | H2AFZ Histone H2A.Z                                   | H2AFZ   | 2.47 | 13,553 DA | 4 | Downregulated  | Nucleus Chromosomes    | required for chromosome segregation during cell division       |
| Q71U19 | H2AFV Histone H2A.V                                   | H2AFV   | 2.47 | 13,509 DA | 4 | Downregulated  | Nucleus Chromosomes    | required for chromosome segregation during cell division       |
| P62805 | HIST4H4 Histone H4                                    | HIST4H4 | 3    | 11,367 DA | 5 | downregulated  | Nucleus Chromosomes    | histone code, and nucleosome remodeling                        |
| P84243 | H3F3B Histone H3.3                                    | H3F3B   | 3.02 | 15,328 DA | 2 | Downregulated  | Nucleus Chromosomes    | histone code, and nucleosome remodeling                        |
| P20674 | COX5A Cytochrome c oxidase subunit 5A, mitochondrial  | COX5A   | 6.61 | 16,762 DA | 1 | down regulated | Mitochondrial membrane | mitochondrial electron transport.                              |

**Table S2.** Differentially expression of key proteins in response to Fe<sub>2</sub>C@C NPs.

| Accession Number | Gene Name | O16/O18 Ratio | Sequence of Unique peptide        | Retention Time | Function                                                            |
|------------------|-----------|---------------|-----------------------------------|----------------|---------------------------------------------------------------------|
| P0CG48           | UBC       | 0.21          | K.TITLEVEPSDTIENVK*.A             | 51.5 min       | Activation of protein kinases, and in signaling                     |
| P62979           | RPS27A    | 0.21          | K.TITLEVEPSDTIENVK*.A             | 51.5 min       | Activation of protein kinases, and in signaling.                    |
| P62987           | UBA52     | 0.21          | K.TITLEVEPSDTIENVK*.A             | 51.5 min       | Activation of protein kinases, and in signaling.                    |
| P52209           | PGD       | 0.31          | R.LGDLWTLDDITLTDWTKPSLSGVAPLPR*.S | 97.6 min       | Oxidative decarboxylation                                           |
| Q16881           | TXNRD1    | 0.33          | R.VVGFHVLGPNAGEVTQGFAAALK*.C      | 74.3 min       | Formation of cell membrane protrusions                              |
| P07355           | ANXA2     | 0.37          | K.GDLEN AFLNLVQCIQNKPLYFADR*.L    | 117.1 min      | Calcium-regulated membrane-binding protein                          |
| Q15293           | RCN1      | 0.39          | R.IDNDGDGFVTTEELK*.T              | 38.4 min       | Regulate calcium-dependent activities                               |
| P63173           | RPL38     | 0.39          | R.YLYTLVITDK*.E                   | 50.9 min       | Structural constituent of ribosome                                  |
| P00338           | LDHA      | 0.39          | K.DLADELALVDVIEDK*.L              | 92.6 min       | Control fermentation process                                        |
| P42166           | TMPO      | 0.4           | R.QEDKDDLDVTELTNEDLLDQLVK*.Y      | 84.8 min       | Structural organization of the nucleus                              |
| P07858           | ANXA5     | 0.41          | K.GLGTDEESILTLTSR*.S              | 90.3 min       | Anticoagulant protein                                               |
| P23528           | CFL1      | 0.42          | K.EILVGDVGTVDPPYATFVK*.M          | 72.4 min       | No data                                                             |
| P13797           | PLS3      | 0.43          | K.ANDDIIVNWNVR*.T                 | 54.7 min       | Regulation of bone development                                      |
| P14618           | PKM       | 0.44          | K.IYVDDGLISLQVK*.Q                | 62.2 min       | Tumor cell proliferation and survival                               |
| P27348           | YWHAQ     | 0.45          | K.TAFDEAIAELDTLNEDSYK*.           | 90.8 min       | Negatively regulates the kinase activity                            |
| P75533           | SF3B1     | 0.47          | K.LLVVDDESTLSPEEQK*.E             | 49.9 min       | Splicing of nuclear pre-mRNA intron.                                |
| P18085           | ARF4      | 0.47          | R.IQEVADELQK*.M                   | 21.4 min       | Vesicle budding,uncoating in Golgi apparatus                        |
| Q01518           | CAP1      | 0.47          | K.AGAAPYVQAFDSSLAGPVAEYLK*.I      | 117.5 min      | Cell polarity                                                       |
| P18669           | PGAM1     | 0.48          | R.ALPFWNEEIVPQIK*.E               | 78.8 min       | Reduced activity                                                    |
| P10599           | TXN       | 0.49          | K.TAFQEALDAAGDK*.L                | 41.2 min       | Inhibits caspase-3 activity                                         |
| P29401           | TKT       | 0.49          | R.TSRPENAIYNNNEDFQVGQAK*.V        | 39.6 min       | Activates co-factor                                                 |
| Q9UK76           | HN1       | 0.49          | R.VLRPPGGGSNFLGFDEPTEQPVR*.K      | 56.3 min       | N-terminally processed                                              |
| P51610           | HCFC1     | 0.49          | R.LGDLWTLDDITLTDWTKPSLSGVAPLPR*.S | 99.7 min       | Control of the cell cycle                                           |
| P16104           | H2AFX     | 1.5           | R.HLQLAIR*.N                      | 19.5 min       | Role in transcription regulation, DNA repair, DNA replication       |
| Q96Qv6           | HIST1H2AA | 1.5           | R.HLQLAIR*.N                      | 19.5 min       | Modifications of histones, code, and nucleosome remodeling          |
| P35268           | RPL22     | 1.52          | K.ITVTSEVPFSK*.R                  | 37.3 min       | Structural constituent of ribosome                                  |
| P40926           | MDH2      | 1.52          | K.VAVLGASGGIGQPLSLLK*.N           | 85.7 min       | Enzyme activity is enhanced by acetylation                          |
| P11940           | PABPC1    | 1.54          | K.GFGFVCFSSPEEATK*.A              | 57.5 min       | Cytoplasmic regulatory processes of mRNA metabolism                 |
| Q13310           | PABPC4    | 1.54          | K.GFGFVCFSSPEEATK*.A              | 57.5 min       | Cytoplasmic regulatory processes of mRNA metabolism                 |
| O15260           | SURF4     | 1.57          | R.LCLISTFLEDGIR*.M                | 84.2 min       | Architecture of the EPR intermediate compartment and of the Golgi   |
| P62158           | CALM1     | 1.58          | K.EAFSLFDKDGDTITTK*.E             | 46.7 min       | Regulates the centrosome cycle and progression through cytokinesis  |
| P62910           | RPL32     | 1.63          | K.SYCAEIAHNVSCK*.N                | 22.0 min       | Structural constituent of ribosome                                  |
| P46783           | RPS10     | 1.65          | R.IAIYELLFK*.E                    | 79.3 min       | Component of the 40S ribosomal subunit.                             |
| P05386           | RPLP1     | 1.66          | K.ALANVNIGSLICNVGAGGPAPAAEK*.K    | 76.2 min       | Plays an important role in the elongation step of protein synthesis |
| P0C0S8           | HIST1H2AG | 1.72          | K.VTIAQGGVLPNIQAVLLPK*.K          | 83.1 min       | Modifications of histones code and nucleosome remodeling            |
| Q16777           | HIST2H2AC | 1.72          | K.VTIAQGGVLPNIQAVLLPK*.K          | 83.1 min       | Modifications of histones code and nucleosome remodeling            |
| Q9BTM1           | H2AFJ     | 1.72          | K.VTIAQGGVLPNIQAVLLPK*.K          | 83.1 min       | Modification of Histones code and nucleosome remodeling.            |
| Q7L7L0           | HIST3H2A  | 1.72          | R.HLQLAIR*.N                      | 19.5 min       | Modifications of histone code, and nucleosome remodeling            |

|        |          |      |                                   |           |                                                                |
|--------|----------|------|-----------------------------------|-----------|----------------------------------------------------------------|
| P07602 | PSAP     | 1.73 | K.EIVDSYLPVILDIK*.G               | 111.9 min | Sequential action of specific hydrolases                       |
| P18124 | RPL7     | 1.87 | R.IVEPYIAWGYPNLK*.S               | 40.7 min  | Translation apparatus; inhibits cell-free translation of mRNAs |
| O60812 | HNRNPCL1 | 1.96 | R.VFIGNLNTLVVK*.K                 | 58.5 min  | Role in nucleosome assembly by neutralizing basic proteins     |
| P07910 | HNRNPC   | 1.96 | R.VFIGNLNTLVVK*.K                 | 58.5 min  | Stability and the level of translation of bound mRNA molecules |
| P47914 | RPL29    | 1.98 | K.AQAAAPASVPAQPK*.R               | 17.9 min  | Structural constituent of ribosome                             |
| P02878 | RPL6     | 2.15 | K.QLASGLLLVTGPLVLNR*.V            | 82.7 min  | Structural constituent of ribosome                             |
| P62241 | RPS8     | 2.21 | R.IIDVVYNASNELVR*.T               | 50.1 min  | Structural constituent of ribosome                             |
| P61604 | HSPE1    | 2.25 | K.VLQATVVAVGSGSK*.G               | 25.8 min  | Suppresses the ATPase activity of the latter                   |
| P0C0S5 | H2AFZ    | 2.47 | R.AGLQFPVGR*.I                    | 32.5 min  | Required for chromosome segregation during cell division       |
| Q71U19 | H2AFV    | 2.47 | R.HLQLAIR*.G                      | 19.5 min  | Required for chromosome segregation during cell division       |
| P62805 | HIST1H4A | 3    | R.DNIQGITKPAIR*.R                 | 24.2 min  | Histone code, and nucleosome remodeling                        |
| P84243 | H3F3A    | 3.02 | R.YRPGTVALR*.E                    | 16.6 min  | Histone code, and nucleosome remodeling                        |
| P20674 | COX5A    | 6.61 | K.EIYPYVIQELRPTLNELGISTPEELGLDKV* | 114.5 min | Mitochondrial electron transport.                              |
